# Supplementary material for: Genome sequence of the basal haplorrhine primate Tarsius syrichta reveals unusual insertions
Source: PubMed Central journal article supplement (PMC5059674; doi:10.1038/ncomms12997), 2016-10-06
Supplement: ncomms12997-s1.pdf [file ncomms12997-s1.pdf]

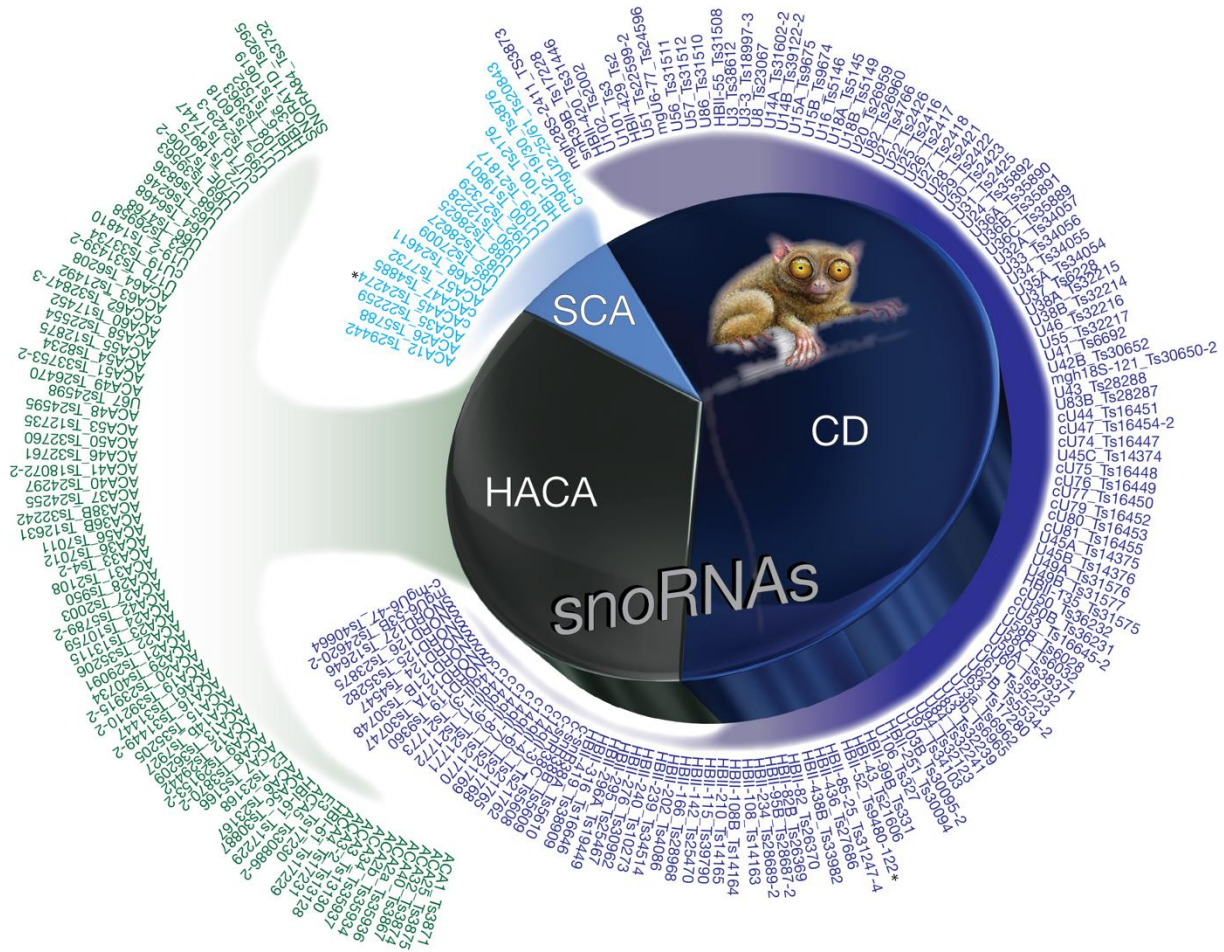

**Supplementary Figure 1.** The snoRNA transcriptome represents 224 snoRNAs plus 153 isoforms/variants (terminally labeled by additional numbers and separated by a dash, e.g., HBII-52\_Ts9480-122\* with 122 isoforms/variants). Here, Ts9480 is the *Tarsius syrichta* RNA library candidate name and HBII-52 the human snoRNABase name. The prefix “c” denotes transcription from a snoRNA cluster. Most snoRNAs are encoded intronically and are transcribed together with their host genes. The snoRNAs are divided in scaRNAs (SCA = small Cajal Body localized RNAs containing C/D and H/ACA box motives), CD = C/D box snoRNAs and HACA = H/ACA box snoRNAs. Drawings of animals are provided by Jón Baldur Hlíðberg. Drawing of Tarsiiformes has been reproduced from main text reference [14] with permission.

HSMAR2  
 MARNAs  
 Charlie3  
 MER6B  
 MER6A  
 Tigger3d  
 MER1B  
 MER1A  
 MER2B  
 MER5A1  
 MER8  
 MER53  
 Tigger3a  
 MER58C  
 MER20  
 MER5A  
 Tigger3  
 Ricksha  
 Tigger4  
 Tigger17a  
 MER5B  
 Cheshire  
 Tigger4a  
 Tigger2  
 Tigger2b\_Pri  
 MER58A  
 MER6  
 MER2  
 Arthur1  
 Tigger3b  
 MER102c  
 MER96B  
 Tigger4b  
 Tigger5  
 MER47A  
 MER96  
 MER46C  
 Tigger2a  
 MER47B  
 Tigger3c  
 Tigger7  
 MER58B  
 Charlie8  
 Tigger5b  
 Arthur1B  
 Charlie17  
 MER44A  
 Charlie17b  
 MER45B  
 MER45C  
 Charlie1a  
 MER63B  
 MER63D  
 Charlie1  
 MER63C  
 Charlie29a  
 MER33  
 Charlie1b  
 Tigger1  
 Zaphod3  
 Charlie4a  
 MER3  
 MER119  
 Arthur1A  
 MER44C  
 Charlie2a  
 Charlie2b

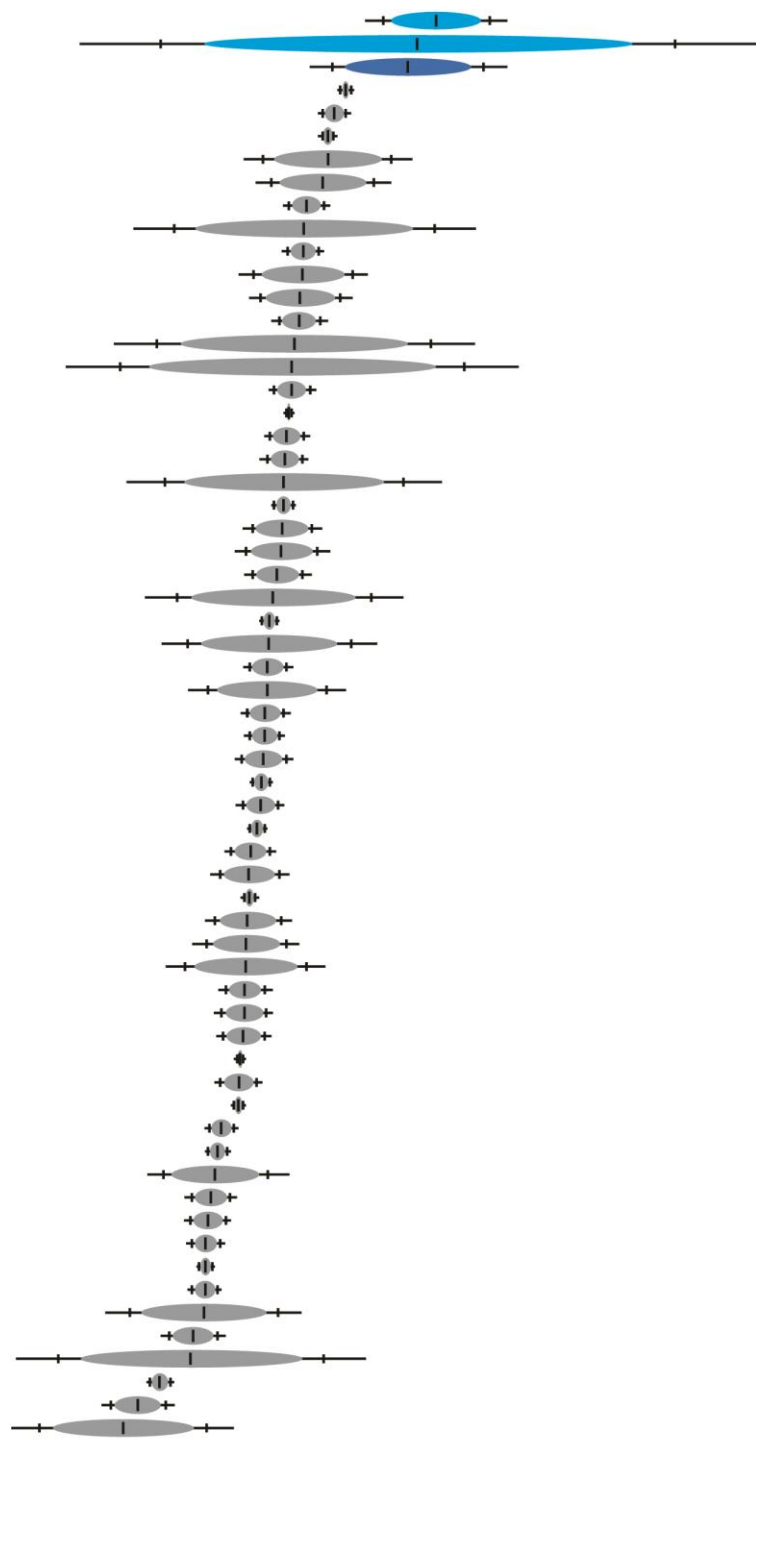

**Supplementary Figure 2:** Transposition in Transposition (TinT) pattern of DNA transposons derived from the tarsier genome. Potentially active elements are shown in blue. HSMAR2 is a non-autonomous DNA transposon that depends on the transposase of the autonomous MARNAs element. The maximum activity period is indicated as a central vertical line in the ovals. The flanking vertical lines represent the 75th percentile activity range, while the end of the lines represent the 99th percentile range of activity. Timescale runs from left to right.

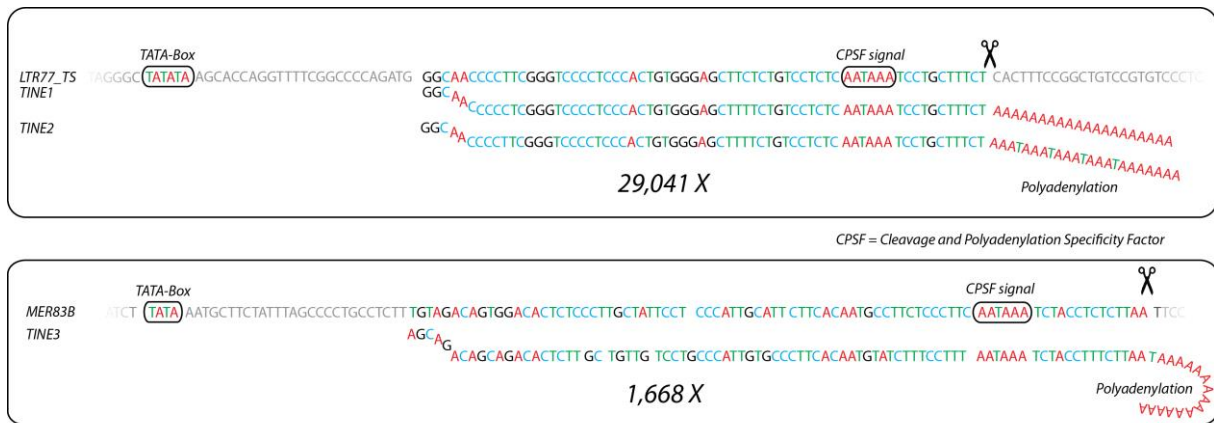

**Supplementary Figure 3.** The three tarsier-specific, TINE-retroposed, multicopy retroseudogenes (consensus sequences, TINE1, TINE2, TINE3) are represented with their putative source genes, the LTR77\_TS and MER82B for TINE1/2 (*top*) and TINE3 (*bottom*), respectively. Note that TINE2 might involve alternative polyadenylation sites within the terminal oligo(A) tail. Hence it might be considered as an alternative cleavage and polyadenylation variant. The LTR/MER gene-specific TATA boxes are used for transcription initiation. The LTR/MER cleavage and polyadenylation specificity factor signals (CPSF) induce cleavage and polyadenylation of the new TINE elements. The tarsier genome contains 29,041 TINE1/2 and 1,668 TINE3 elements.

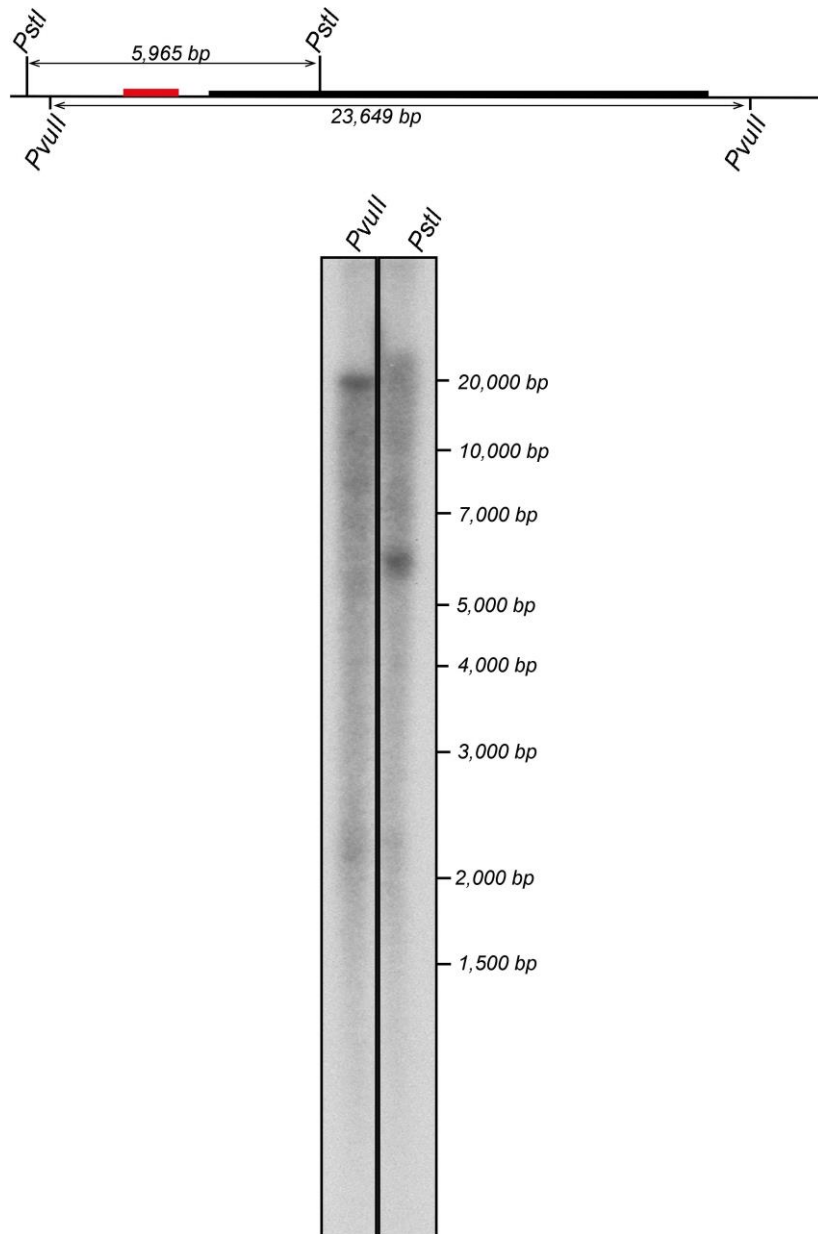

**Supplementary Figure 4:** Southern blot of the full-length numt sequence region.

PSTI and PVUII digested genomic *Tarsius* DNA was used to hybridize the red-labeled probe with PCR amplification primers in capital letters (TGAAGGACACAGAGGAATCCAAGATAACCtttgacttgacctaagatggaagtgagtggtaataaccagttactaaggaaatgcgggaagattagatatgtcaaatcaggagtctatttgacacattgtttgagatgtttattgaaaccaagagatgtgagtaggacgtgggtattgaaatcaaggttcagggagatatatttgtagttgtagcataatgaggtttatggggttatatgagatcactcattaagagttcaggaa gaaaagactgaggggatcaataagaatgaaggtaataaagtgtattgtccatgaagtcaagtgaaaaaaaaagtattcaagaaggagggaaatgagtagctgtttgaaatattgctgaaagccagggtaaatgaattggtaactgacattggatttggaaggggtagtgaccttataagtgacgtttctgtggctgatgagaaggaagatctgaccaaagtaagttagctagggcatggGATGCAATGTGGAGAGTGAGTAATG) to the flanking region of the detected complete mitochondrial insertion. Hybridization signals are shown in the lower part of the figure for both digestion experiments (about 23,000 bps and 6,000 bps) in addition to a size marker.

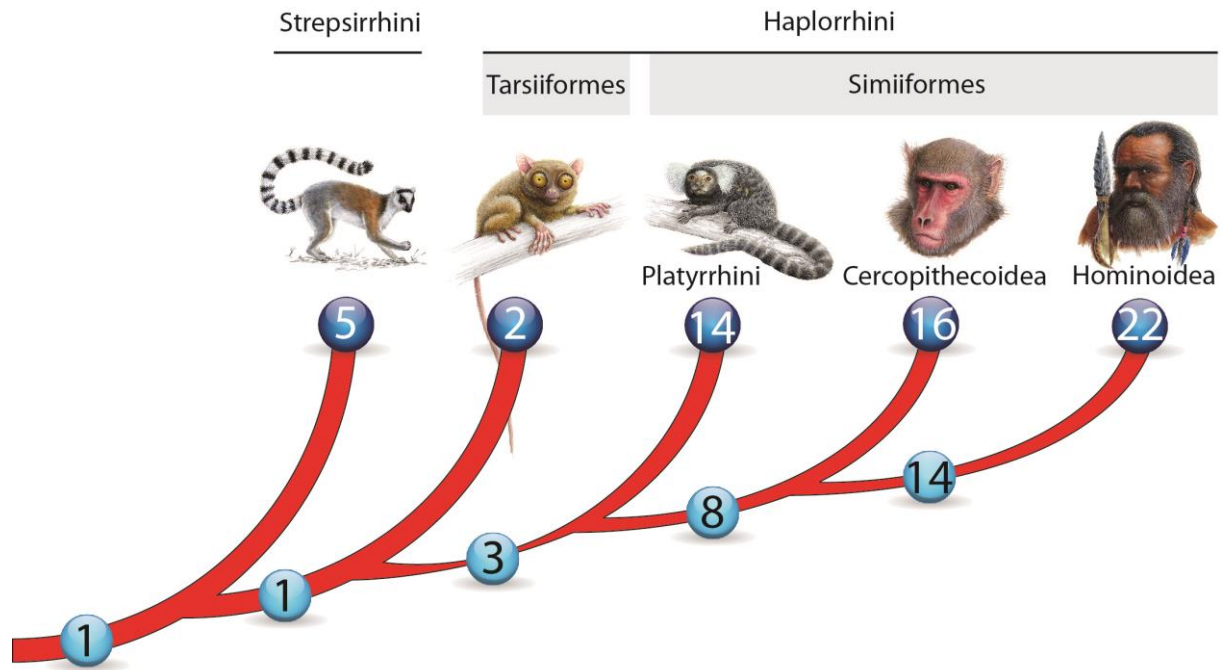

**Supplementary Figure 5.** Detection of numt insertions in selected primate and internodal lineages. In comparison to the small number of numts that we found in the tarsier (2), we detected the same low number in the genome of the strepsirrhine *Microcebus murinus* representative for other Strepsirrhini and just one numt common for all primates. Fourteen, 16, and 22 lineage specific numts were detected in *Callithrix jacchus*, *Macaca mulatta* and *Homo sapiens*, respectively. Few numts we derived for the ancestral lineages of Haplorrhini (1) and Anthropoidea (3) and a somewhat higher number was reconstructed for the common ancestor of Catarrhini (8) and human plus chimpanzee (14) (see Supplementary Fig. 3). Drawings of animals are provided by Jón Baldur Hlíðberg. Drawings of Tarsiiformes and Hominoidea have been reproduced from main text reference [14] with permission.

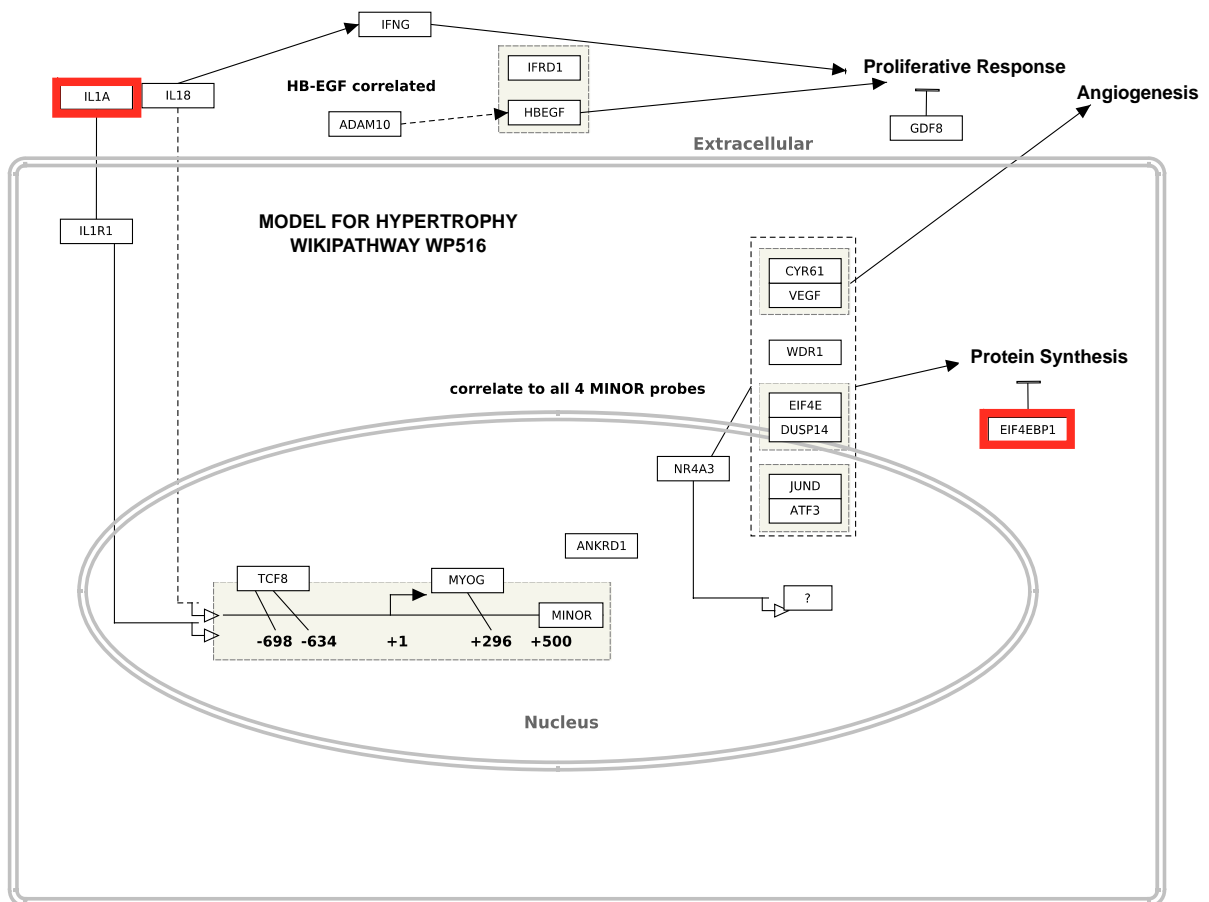

**Supplementary Figure 6.** A model for hypertrophy (Wikipathway WP516) depicts the role of two positively selected tarsier genes (*IL1A* and *EIF4EBP1*) within the pathway. This pathway is known to regulate skeletal muscle, which typically occurs as tissue growth through increased cell size. *EIF4EBP1* mediates the regulation of protein translation by hormones, growth factors and other stimuli in the cytoplasm, while *IL1A* stimulates cell proliferation by inducing growth factor activity.

**Supplementary Table 1.** Assembly metrics for other primates using varied sequencing technologies

| Common Name        | Assembly Version       | N50 Contig kb | N50 Scaffold Mb | Assembly Size Gb | Gene count |
|--------------------|------------------------|---------------|-----------------|------------------|------------|
| Chimpanzee         | Pan_tro 2.1.4          | 50            | 9.0             | 3.3              | 18,759     |
| Gorilla            | gorGor3.1              | 12            | 0.9             | 3.0              | 20,962     |
| Orangutan          | P_pygmaeus2.0.2        | 16            | 0.7             | 3.4              | 20,424     |
| Gibbon             | Nleu1.0                | 35            | 52.0            | 2.9              | 18,575     |
| Rhesus macaque     | MacaMv7                | 54            | 3.0             | 3.2              | 21,905     |
| Cynomolgus macaque | MFas 5.0               | 86            | 88.0            | 2.9              | NA         |
| Marmoset           | C_jacchus3.2.1         | 29            | 5.0             | 2.9              | 20,993     |
| Bushbaby           | OtoGar3.0              | 27            | 13.0            | 2.5              | 19,506     |
| Baboon             | PapAnu2.0              | 40            | 0.5             | 2.9              | 19,210     |
| Squirrel monkey    | saiBol1                | 38            | 18.0            | 2.6              | NA         |
| Snub-nose monkey   | Rrox V1                | 77            | 1.5             | 2.9              | NA         |
| Tarsier            | Tarsius_syrichta-2.0.1 | 38            | 0.4             | 3.4              | 20,820     |
| Bonobo             | Pan_pan                | 66            | 10.0            | 2.9              | 20,826     |

**Supplementary Table 2.** Tarsier snoRNAs in comparison to human

| Host gene | human       | tarsier            | draft name               | length | reads | class | human         |       |               |       |               |  |
|-----------|-------------|--------------------|--------------------------|--------|-------|-------|---------------|-------|---------------|-------|---------------|--|
|           |             |                    |                          |        |       |       | target site 1 |       | target site 2 |       | target site 3 |  |
| 1         | 2           | 3                  | 4                        | 5      | 6     | 7     | 8             |       | 9             |       | 10            |  |
| AK128061  | ACA1        | ACA1_Ts3871        | tar_cand_3871_185_83     | 140    | 83    | HACA  | 28S           | U4441 |               |       |               |  |
|           | ACA25       | ACA25_Ts3875       | tar_cand_3875_187_307    | 132    | 307   | HACA  | 18S           | U801  | 18S           | U814  |               |  |
|           | ACA32       | ACA32_Ts3874       | tar_cand_3874_195_92     | 120    | 92    | HACA  | 28S           | U1847 |               |       |               |  |
|           | ACA40       | ACA40_Ts3867       | tar_cand_3867_134_172    | 129    | 172   | HACA  | 28S           | U4546 | 18S           | U1174 |               |  |
|           | mgh28S-2411 | mgh28S-2411_Ts3873 | tar_cand_3873_168_6446   | 72     | 6446  | CD    | 28S           | G2411 |               |       |               |  |
|           |             |                    |                          |        |       |       |               |       |               |       |               |  |
| FLJ20436  | ACA2a       | ACA2a_Ts35936      | tar_cand_35936_176_675   | 135    | 675   | HACA  | 28S           | U4263 | 28S           | U4282 |               |  |
|           | ACA2b       | ACA2b_Ts35934      | tar_cand_35934_191_99    | 137    | 99    | HACA  | 28S           | U4263 | 28S           | U4282 |               |  |
|           | ACA34       | ACA34_Ts35937      | tar_cand_35937_183_1064  | 141    | 1064  | HACA  | 28S           | U4269 | 28S           | U4282 |               |  |
|           |             |                    |                          |        |       |       |               |       |               |       |               |  |
| RPL27A    | ACA3        | ACA3_Ts13130       | tar_cand_13130_188_2439  | 130    | 2439  | HACA  | 28S           | U3899 | 28S           | U3938 |               |  |
|           | ACA3-2      | ACA3-2_Ts13128     | tar_cand_13128_194_4016  | 131    | 4016  | HACA  | 28S           | U3899 |               |       |               |  |
|           |             |                    |                          |        |       |       |               |       |               |       |               |  |
| EIF4A2    | ACA4        | ACA4_Ts17231       | tar_cand_17231_326_2881  | 140    | 2881  | HACA  | 18S           | U1347 |               |       |               |  |
|           | HBI-61      | HBI-61_Ts17229     | tar_cand_17229_356_2538  | 176    | 2538  | HACA  | 28S           | U4606 |               |       |               |  |
|           | snR39B      | snR39B_Ts17228     | tar_cand_17228_339_87325 | 70     | 87325 | CD    | 28S           | G1509 |               |       |               |  |
|           | E3          | E3_Ts17230         | tar_cand_17230_208_9634  | 208    | 9634  | HACA  | 28S           | U4390 |               |       |               |  |
|           |             |                    |                          |        |       |       |               |       |               |       |               |  |
| TBRG4     | ACA5        | ACA5_Ts30886       | tar_cand_30886_136_49    | 134    | 49    | HACA  | 18S           | U1238 | 28S           | U1625 |               |  |



|          |          |               |                              |          |          |              |          |       |          |       |           |           |
|----------|----------|---------------|------------------------------|----------|----------|--------------|----------|-------|----------|-------|-----------|-----------|
|          |          | ACA5_Ts30888  | tar_cand_30888_277_2749<br>4 | 134      | 27494    | HACA         |          |       |          |       |           |           |
|          | ACA5c    | ACA5c_Ts30887 | tar_cand_30887_187_2358      | 136      | 2358     | HACA         | 18S      | U1238 | 18S      | U1625 |           |           |
|          |          |               |                              |          |          |              |          |       |          |       |           |           |
| RPSA     | ACA6     | ACA6_Ts23167  | tar_cand_23167_205_1134      | 205      | 1134     | HACA         | 28S      | U3616 |          |       |           |           |
| LAMR1    | E2       | E2_Ts23168    | tar_cand_23168_205_1654      | 155      | 1654     | HACA         | 28S      | U3830 | 28S      | U3832 |           |           |
| <b>1</b> | <b>2</b> | <b>3</b>      | <b>4</b>                     | <b>5</b> | <b>6</b> | <b>7</b>     | <b>8</b> |       | <b>9</b> |       | <b>10</b> |           |
| RPL32    | ACA7     | ACA7_Ts5166   | tar_cand_5166_188_1873       | 140      | 1873     | HACA         | 28S      | U1569 | 28S      | U1779 |           |           |
|          |          |               |                              |          |          |              |          |       |          |       |           |           |
| MGC5306  | ACA8     | ACA8_Ts3870   | tar_cand_3870_328_20904      | 139      | 20904    | HACA         | 18S      | U1056 | 18S      | U1081 | 28<br>S   | U383<br>2 |
|          |          | ACA8_Ts39088  | tar_cand_39088_166_724       | 137      | 724      | HACA         |          |       |          |       |           |           |
|          |          |               |                              |          |          |              |          |       |          |       |           |           |
| SNHG15   | ACA9     | ACA9_Ts29153  | tar_cand_29153_151_36        | 134      | 36       | HACA         | 28S      | U1670 | 28S      | U1769 |           |           |
|          |          | ACA9_Ts30890  | tar_cand_30890_171_291       | 133      | 291      | HACA         |          |       |          |       |           |           |
|          |          |               |                              |          |          |              |          |       |          |       |           |           |
| POLA     | ACA12    | ACA12_Ts29442 | tar_cand_29442_188_5247      | 129      | 5247     | SCARNA2<br>3 | U6       | U40   |          |       |           |           |
|          |          |               |                              |          |          |              |          |       |          |       |           |           |
| TIGA1    | ACA13    | ACA13_Ts36209 | tar_cand_36209_170_1433      | 133      | 1433     | HACA         | 18S      | U1248 |          |       |           |           |
|          |          |               |                              |          |          |              |          |       |          |       |           |           |
| TIOMM20  | ACA14b   | ACA14b_Ts7927 | tar_cand_7927_231_4764       | 136      | 4764     | HACA         | 18S      | U966  |          |       |           |           |
|          |          |               |                              |          |          |              |          |       |          |       |           |           |
| CCT6A    | ACA15    | ACA15_Ts35205 | tar_cand_35205_162_190       | 135      | 190      | HACA         | 18S      | U1367 |          |       |           |           |
|          |          |               |                              |          |          |              |          |       |          |       |           |           |
| AF277181 | ACA16    | ACA16_Ts31449 | tar_cand_31449_244_623       | 133      | 623      | HACA         | 28S      | U4412 |          |       |           |           |
|          | ACA44    | ACA44_Ts31448 | tar_cand_31448_199_2055<br>1 | 131      | 20551    | HACA         | 18S      | U822  | 18S      | U686  |           |           |

|          |          |                  |                          |          |          |          |          |          |           |       |  |  |
|----------|----------|------------------|--------------------------|----------|----------|----------|----------|----------|-----------|-------|--|--|
|          | ACA61    | ACA61_Ts31447    | tar_cand_31447_196_27106 | 133      | 27106    | HACA     | 28S      | U2495    |           |       |  |  |
|          | HBII-420 | HBII-420_Ts31446 | tar_cand_31446_126_14385 | 80       | 14385    | CD       | 28S      | A2774    |           |       |  |  |
|          |          |                  |                          |          |          |          |          |          |           |       |  |  |
| EIF3S10  | ACA19    | ACA19_Ts39210    | tar_cand_39210_152_45    | 133      | 45       | HACA     | 28S      | U3618    | 28S       | U3709 |  |  |
|          |          | ACA19_Ts39212    | tar_cand_39212_176_708   | 129      | 708      | HACA     |          |          |           |       |  |  |
| <b>1</b> | <b>2</b> | <b>3</b>         | <b>4</b>                 | <b>5</b> | <b>6</b> | <b>7</b> | <b>8</b> | <b>9</b> | <b>10</b> |       |  |  |
| TCP1     | ACA20    | ACA20_Ts23915    | tar_cand_23915_161_101   | 130      | 101      | HACA     | 18S      | U651     |           |       |  |  |
|          |          | ACA20_Ts40735    | tar_cand_40735_177_357   | 130      | 357      | HACA     |          |          |           |       |  |  |
|          | ACA29    | ACA29_Ts40734    | tar_cand_40734_193_335   | 137      | 335      | HACA     | ?        |          |           |       |  |  |
|          |          |                  |                          |          |          |          |          |          |           |       |  |  |
| RPL23    | ACA21    | ACA21_Ts29091    | tar_cand_29091_249_2851  | 136      | 2851     | HACA     | 28S      | U4401    | 28S       | U4470 |  |  |
|          |          |                  |                          |          |          |          |          |          |           |       |  |  |
| BC052238 | ACA22    | ACA22_Ts35206    | tar_cand_35206_180_331   | 134      | 331      | HACA     | 28S      | U4966    | 28S       | U4975 |  |  |
|          |          |                  |                          |          |          |          |          |          |           |       |  |  |
| IPO7     | ACA23    | ACA23_Ts13115    | tar_cand_13115_256_676   | 188      | 676      | HACA     | 28S      | U3737    | 28S       | U4331 |  |  |
|          |          |                  |                          |          |          |          |          |          |           |       |  |  |
| SNHG8    | ACA24    | ACA24_Ts10759    | tar_cand_10759_173_816   | 131      | 816      | HACA     | 18S      | U863     | 18S       | U609  |  |  |
|          |          |                  |                          |          |          |          |          |          |           |       |  |  |
| KIAA0907 | ACA26    | ACA26_Ts5788     | tar_cand_5788_189_1511   | 129      | 1511     | SCARNA4  | U2       | U41      | U2        | U39   |  |  |
|          | ACA42    | ACA42_Ts5789     | tar_cand_5789_204_5145   | 135      | 5145     | HACA     | 18S      | U572     | 18S       | U109  |  |  |
|          |          | ACA42_Ts33368    | tar_cand_33368_181_3243  | 134      | 3243     | HACA     |          |          |           |       |  |  |
|          |          |                  |                          |          |          |          |          |          |           |       |  |  |
| RPL21    | ACA27    | ACA27_Ts2003     | tar_cand_2003_186_23363  | 126      | 23363    | HACA     | 28S      | U3694    | 28S       | U4522 |  |  |
|          | U102     | U102_Ts2002      | tar_cand_2002_122_142218 | 122      | 142218   | CD       | 28S      | G4020    |           |       |  |  |

|             |          |                |                              |          |             |          |          |       |          |       |           |  |
|-------------|----------|----------------|------------------------------|----------|-------------|----------|----------|-------|----------|-------|-----------|--|
| EIF5        | ACA28    | ACA28_Ts950    | tar_cand_950_217_1457        | 126      | 1457        | HACA     | 18S      | U815  | 18S      | U866  |           |  |
|             |          |                |                              |          |             |          |          |       |          |       |           |  |
| TPT1        | ACA31    | ACA31_Ts2108   | tar_cand_2108_143_75         | 126      | 75          | HACA     | 18S      | U218  | 28S      | U3713 |           |  |
|             |          |                |                              |          |             |          |          |       |          |       |           |  |
| RPS12       | ACA33    | ACA33_Ts4      | tar_cand_4_166_511           | 131      | 511         | HACA     | 28S      | U4966 |          |       |           |  |
|             |          | ACA33_Ts21993  | tar_cand_21993_127_43        | 127      | 43          | HACA     |          |       |          |       |           |  |
|             | U101     | U101_Ts3       | tar_cand_3_130_71560         | 74       | 71560       | CD       | ?        |       |          |       |           |  |
|             | HBII-429 | HBII-429_Ts2   | tar_cand_2_138_1830743       | 76       | 183074<br>3 | CD       | 18S      | G436  |          |       |           |  |
| <b>1</b>    | <b>2</b> | <b>3</b>       | <b>4</b>                     | <b>5</b> | <b>6</b>    | <b>7</b> | <b>8</b> |       | <b>9</b> |       | <b>10</b> |  |
| PPP1R8      | ACA35    | ACA35_Ts22259  | tar_cand_22259_217_3060      | 165      | 3060        | SCARNA1  | U2       | U89   |          |       |           |  |
|             |          |                |                              |          |             |          |          |       |          |       |           |  |
| DKC1        | ACA36    | ACA36_Ts7012   | tar_cand_7012_183_1162       | 133      | 1162        | HACA     | 18S      | U1244 | 18S      | U105  |           |  |
|             | ACA56    | ACA56_Ts7011   | tar_cand_7011_148_32         | 129      | 32          | HACA     | 28S      | U1664 |          |       |           |  |
|             |          |                |                              |          |             |          |          |       |          |       |           |  |
| RAB3-GAP150 | ACA36B   | ACA36B_Ts12631 | tar_cand_12631_177_595       | 131      | 595         | HACA     | 18S      | U105  | 18S      | U1244 |           |  |
| NOL11       | ACA38B   | ACA38B_Ts32242 | tar_cand_32242_198_41        | 131      | 41          | HACA     | ?        |       |          |       |           |  |
|             |          |                |                              |          |             |          |          |       |          |       |           |  |
| MBD2        | ACA37    | ACA37_Ts24255  | tar_cand_24255_185_1342<br>5 | 132      | 13425       | HACA     | 28S      | U4643 |          |       |           |  |
|             |          |                |                              |          |             |          |          |       |          |       |           |  |
| AK128061    | ACA40    | ACA40_Ts24297  | tar_cand_24297_88_31         | 87       | 31          | HACA     | 18S      | U1174 | 28S      | U4546 |           |  |
|             |          |                |                              |          |             |          |          |       |          |       |           |  |
| EEF1B2      | ACA41    | ACA41_Ts18072  | tar_cand_18072_171_554       | 134      | 554         | HACA     | 18S      | U1643 |          |       |           |  |
|             |          | ACA41_Ts22598  | tar_cand_22598_212_1110      | 137      | 1110        | HACA     |          |       |          |       |           |  |

|             |          |                 |                              |          |          |              |          |          |           |       |  |  |
|-------------|----------|-----------------|------------------------------|----------|----------|--------------|----------|----------|-----------|-------|--|--|
|             | U51      | U51_Ts22599     | tar_cand_22599_174_4186      | 70       | 4186     | CD           | 28S      | A1511    |           |       |  |  |
|             |          | U51_Ts7457      | tar_cand_7457_69_28          | 68       | 28       | CD           |          |          |           |       |  |  |
|             |          |                 |                              |          |          |              |          |          |           |       |  |  |
| EST Cluster | ACA45    | ACA45_Ts24274   | tar_cand_24274_211_565       | 126      | 565      | SCARNA1<br>5 | U2       | U37      |           |       |  |  |
|             |          |                 |                              |          |          |              |          |          |           |       |  |  |
| CNOT1       | ACA46    | ACA46_Ts32761   | tar_cand_32761_166_2535      | 137      | 2535     | HACA         | 18S      | U649     |           |       |  |  |
|             | ACA50    | ACA50_Ts32760   | tar_cand_32760_311_793       | 136      | 793      | HACA         | 18S      | U34      | 18S       | U105  |  |  |
|             |          |                 |                              |          |          |              |          |          |           |       |  |  |
| EST cluster | ACA47    | ACA47_Ts4885    | tar_cand_4885_237_1955       | 186      | 1955     | SCARNA1<br>6 | U1       | U5       |           |       |  |  |
|             |          |                 |                              |          |          |              |          |          |           |       |  |  |
| SLC25A3     | ACA53    | ACA53_Ts12735   | tar_cand_12735_294_3759      | 247      | 3759     | HACA         | ?        |          |           |       |  |  |
| <b>1</b>    | <b>2</b> | <b>3</b>        | <b>4</b>                     | <b>5</b> | <b>6</b> | <b>7</b>     | <b>8</b> | <b>9</b> | <b>10</b> |       |  |  |
| EIF4A1      | ACA48    | ACA48_Ts24595   | tar_cand_24595_390_274       | 135      | 274      | HACA         | 28S      | U3797    |           |       |  |  |
|             | U67      | U67_Ts24598     | tar_cand_24598_180_417       | 142      | 417      | HACA         | 18S      | U1445    |           |       |  |  |
|             | mgU6-77  | mgU6-77_Ts24596 | tar_cand_24596_204_2601<br>2 | 151      | 26012    | CD           | U6       | C77      | 28S       | C3787 |  |  |
|             |          |                 |                              |          |          |              |          |          |           |       |  |  |
| EP400       | ACA49    | ACA49_Ts26470   | tar_cand_26470_199_312       | 134      | 312      | HACA         | ?        |          |           |       |  |  |
|             |          |                 |                              |          |          |              |          |          |           |       |  |  |
| NOL5A       | ACA51    | ACA51_Ts33753   | tar_cand_33753_173_758       | 132      | 758      | HACA         | ?        |          |           |       |  |  |
|             |          | ACA51_Ts31509   | tar_cand_31509_170_598       | 129      | 598      | HACA         |          |          |           |       |  |  |
|             | U56      | U56_Ts31511     | tar_cand_31511_187_9004      | 67       | 9004     | CD           | 18S      | C517     |           |       |  |  |
|             | U57      | U57_Ts31512     | tar_cand_31512_116_5135<br>6 | 70       | 51356    | CD           | 18S      | A99      |           |       |  |  |
|             | U86      | U86_Ts31510     | tar_cand_31510_96_64         | 85       | 64       | CD           | ?        |          |           |       |  |  |
|             | HBII-55  | HBII-55_Ts31508 | tar_cand_31508_116_8204      | 71       | 8204     | CD           | 18S      | U1288    |           |       |  |  |

|                |          |               |                          |          |          |              |          |          |           |       |  |  |
|----------------|----------|---------------|--------------------------|----------|----------|--------------|----------|----------|-----------|-------|--|--|
| NAP1L4         | ACA54    | ACA54_Ts8234  | tar_cand_8234_183_13919  | 122      | 13919    | HACA         | 28S      | U3801    | 28S       | U4539 |  |  |
|                |          |               |                          |          |          |              |          |          |           |       |  |  |
| PABPC4         | ACA55    | ACA55_Ts12875 | tar_cand_12875_187_12014 | 135      | 12014    | HACA         | 18S      | U36      |           |       |  |  |
|                |          |               |                          |          |          |              |          |          |           |       |  |  |
| CHD4           | ACA57    | ACA57_Ts7732  | tar_cand_7732_186_825    | 139      | 825      | SCARNA1<br>1 | U5       | U43      |           |       |  |  |
|                |          |               |                          |          |          |              |          |          |           |       |  |  |
| MRPL3          | ACA58    | ACA58_Ts22554 | tar_cand_22554_180_554   | 137      | 554      | HACA         | 28S      | U3823    |           |       |  |  |
|                |          |               |                          |          |          |              |          |          |           |       |  |  |
| LOC128439      | ACA60    | ACA60_Ts17452 | tar_cand_17452_224_44072 | 134      | 44072    | HACA         | 18S      | U1004    |           |       |  |  |
|                |          |               |                          |          |          |              |          |          |           |       |  |  |
| EST cluster    | ACA62    | ACA62_Ts32847 | tar_cand_32847_172_13070 | 126      | 13070    | HACA         | 18S      | U34      | 18S       | U105  |  |  |
|                |          | ACA62_Ts33863 | tar_cand_33863_176_3313  | 126      | 3313     | HACA         |          |          |           |       |  |  |
|                |          | ACA62_Ts33864 | tar_cand_33864_183_3742  | 126      | 3742     | HACA         |          |          |           |       |  |  |
| <b>1</b>       | <b>2</b> | <b>3</b>      | <b>4</b>                 | <b>5</b> | <b>6</b> | <b>7</b>     | <b>8</b> | <b>9</b> | <b>10</b> |       |  |  |
| ATP2B4         | ACA63    | ACA63_Ta21492 | tar_cand_21492_166_1130  | 123      | 1130     | HACA         | 18S      | U814     |           |       |  |  |
|                |          |               |                          |          |          |              |          |          |           |       |  |  |
| DKFZp686N06141 | ACA64    | ACA64_Ts6208  | tar_cand_6208_167_1848   | 124      | 1848     | HACA         | 28S      | U4331    |           |       |  |  |
|                |          |               |                          |          |          |              |          |          |           |       |  |  |
| CHD3           | ACA68    | ACA68_Ts24611 | tar_cand_24611_279_51    | 136      | 51       | SCARNA2<br>1 | U12      | U19      |           |       |  |  |
|                |          |               |                          |          |          |              |          |          |           |       |  |  |
| trans unit     | U3       | U3_Ts38612    | tar_cand_38612_248_30738 | 215      | 30738    | CD           | ?        |          |           |       |  |  |
|                |          |               |                          |          |          |              |          |          |           |       |  |  |

|                |          |               |                              |          |          |          |          |          |           |       |        |    |
|----------------|----------|---------------|------------------------------|----------|----------|----------|----------|----------|-----------|-------|--------|----|
|                | U3-3     | U3-3_Ts18997  | tar_cand_18997_230_1555<br>1 | 217      | 15551    | CD       | ?        |          |           |       |        |    |
|                |          | U3-3_Ts18317  | tar_cand_18317_88_33         | 88       | 33       | CD       | ?        |          |           |       |        |    |
|                |          |               |                              |          |          |          |          |          |           |       |        |    |
|                | U8       | U8_Ts23067    | tar_cand_23067_158_3430      | 138      | 3430     | CD       | ?        |          |           |       |        |    |
|                |          |               |                              |          |          |          |          |          |           |       |        |    |
| RPS13          | U14A     | U14A_Ts31602  | tar_cand_31602_122_358       | 91       | 358      | CD       | 18S      | C462     |           |       |        |    |
|                |          | U14A_Ts39123  | tar_cand_39123_228_1502<br>4 | 88       | 15024    | CD       |          |          |           |       |        |    |
|                | U14B     | U14B_Ts39122  | tar_cand_39122_122_1034      | 87       | 1034     | CD       | 18S      | C462     |           |       |        |    |
|                |          | U14B_Ts31600  | tar_cand_31600_213_926       | 92       | 926      | CD       |          |          |           |       |        |    |
|                |          |               |                              |          |          |          |          |          |           |       |        |    |
| RPS3           | U15A     | U15A_Ts9675   | tar_cand_9675_217_1947       | 147      | 1947     | CD       | 28S      | A3764    |           |       |        |    |
|                | U15B     | U15B_Ts9674   | tar_cand_9674_236_6783       | 146      | 6783     | CD       | 28S      | A3764    |           |       |        |    |
|                |          |               |                              |          |          |          |          |          |           |       |        |    |
| RPL4           | U16      | U16_Ts5146    | tar_cand_5146_158_90639      | 101      | 90639    | CD       | 18S      | A484     |           |       |        |    |
|                |          |               |                              |          |          |          |          |          |           |       |        |    |
|                | U18A     | U18A_Ts5145   | tar_cand_5145_182_27894<br>6 | 70       | 278946   | CD       | 28S      | A1313    |           |       |        |    |
|                | U18B     | U18B_TS5149   | tar_cand_5149_164_1129       | 70       | 1129     | CD       | 28S      | A1313    |           |       |        |    |
| <b>1</b>       | <b>2</b> | <b>3</b>      | <b>4</b>                     | <b>5</b> | <b>6</b> | <b>7</b> | <b>8</b> | <b>9</b> | <b>10</b> |       |        |    |
| U17HG          | U17b     | U17b_Ts31439  | tar_cand_31439_312_2681      | 205      | 2681     | HACA     | ?        |          |           |       |        |    |
|                |          | U17b_Ts31438  | tar_cand_31438_275_7258      | 204      | 7258     | HACA     | ?        |          |           |       |        |    |
| U19H noncoding | U19      | U19_Ts33734   | tar_cand_33734_263_665       | 203      | 665      | HACA     | 28S      | U3741    | 28S       | U3743 | U<br>3 | U8 |
|                |          |               |                              |          |          |          |          |          |           |       |        |    |
| ATP6VOE        | U19-2    | U19-2_Ts14810 | tar_cand_14810_259_760       | 207      | 760      | HACA     | 28S      | U3741    | 28S       | U3743 |        |    |
|                |          |               |                              |          |          |          |          |          |           |       |        |    |

|          |          |              |                           |          |          |          |          |          |           |       |  |  |
|----------|----------|--------------|---------------------------|----------|----------|----------|----------|----------|-----------|-------|--|--|
| NCL      | U20      | U20_Ts26959  | tar_cand_26959_121_20893  | 79       | 20893    | CD       | 18S      | U1804    |           |       |  |  |
|          | U23      | U23_Ts26958  | tar_cand_26958_287_342    | 137      | 342      | HACA     | 18S      | U93      |           |       |  |  |
|          | U82/Z25  | U82_Ts26960  | tar_cand_26960_119_58359  | 75       | 58359    | CD       | 18S      | A1678    |           |       |  |  |
|          |          |              |                           |          |          |          |          |          |           |       |  |  |
| RPL5     | U21      | U21_Ts4766   | tar_cand_4766_149_6021    | 95       | 6021     | CD       | 28S      | G1303    |           |       |  |  |
|          | U66      | U66_Ts4768   | tar_cand_4768_175_304     | 133      | 304      | HACA     | 18S      | U119     |           |       |  |  |
|          |          |              |                           |          |          |          |          |          |           |       |  |  |
| UHG      | U22      | U22_Ts2426   | tar_cand_2426_193_143998  | 125      | 143998   | CD       | ?        |          |           |       |  |  |
|          | U25      | U25_Ts2416   | tar_cand_2416_109_4637    | 68       | 4637     | CD       | 18S      | G1490    |           |       |  |  |
|          | U26      | U26_Ts2417   | tar_cand_2417_114_33281   | 75       | 33281    | CD       | 28S      | A389     |           |       |  |  |
|          | U27      | U27_Ts2418   | tar_cand_2418_196_556356  | 71       | 556356   | CD       | 18S      | A27      |           |       |  |  |
|          | U28      | U28_Ts2421   | tar_cand_2421_104_1282    | 75       | 1282     | CD       | 18S      | C1391    |           |       |  |  |
|          | U29      | U29_Ts2422   | tar_cand_2422_93_454      | 65       | 454      | CD       | 28S      | A4493    |           |       |  |  |
|          | U30      | U30_Ts2423   | tar_cand_2423_187_895319  | 71       | 895319   | CD       | 28S      | A3804    |           |       |  |  |
|          | U31      | U31_Ts2425   | tar_cand_2425_175_91210   | 68       | 91210    | CD       | 28S      | A4166    |           |       |  |  |
|          |          |              |                           |          |          |          |          |          |           |       |  |  |
| RPL7A    | U24      | U24_Ts35892  | tar_cand_35892_204_74125  | 76       | 74125    | CD       | 28S      | C2338    | 28S       | C2352 |  |  |
|          | U36A     | U36A_Ts35890 | tar_cand_35890_157_50     | 72       | 50       | CD       | 18S      | A668     |           |       |  |  |
|          | U36B     | U36B_Ts35891 | tar_cand_35891_167_47861  | 69       | 47861    | CD       | 18S      | A668     |           |       |  |  |
|          | U36C     | U36C_Ts35889 | tar_cand_35889_124_21412  | 67       | 21412    | CD       | 28S      | A3703    |           |       |  |  |
| <b>1</b> | <b>2</b> | <b>3</b>     | <b>4</b>                  | <b>5</b> | <b>6</b> | <b>7</b> | <b>8</b> | <b>9</b> | <b>10</b> |       |  |  |
| RPL13A   | U32A     | U32A_Ts34057 | tar_cand_34057_269_168303 | 77       | 168303   | CD       | 18S      | G1328    | 28S       | A1511 |  |  |
|          | U33      | U33_Ts34056  | tar_cand_34056_224_13088  | 83       | 13088    | CD       | 18S      | U1326    |           |       |  |  |

|          |            |                    |                           |          |          |          |          |          |           |  |  |  |
|----------|------------|--------------------|---------------------------|----------|----------|----------|----------|----------|-----------|--|--|--|
|          | U34        | U34_Ts34055        | tar_cand_34055_122_132148 | 66       | 132148   | CD       | 28S      | U2824    |           |  |  |  |
|          | U35A       | U35A_Ts34054       | tar_cand_34054_142_11246  | 85       | 11246    | CD       | 28S      | C4506    |           |  |  |  |
| EEF2     | U37        | U37_Ts6228         | tar_cand_6228_154_98942   | 65       | 98942    | CD       | 28S      | A3697    |           |  |  |  |
| RPS8     | U38A       | U38A_Ts32215       | tar_cand_32215_121_2886   | 71       | 2886     | CD       | 28S      | A1858    |           |  |  |  |
|          | U38B       | U38B_Ts32214       | tar_cand_32214_222_11122  | 69       | 11122    | CD       | 28S      | A1858    |           |  |  |  |
|          | U46        | U40_Ts32216        | tar_cand_32216_162_285335 | 98       | 285335   | CD       | 28S      | A3739    |           |  |  |  |
|          | U55        | U55_Ts32217        | tar_cand_32217_115_88133  | 73       | 88133    | CD       | 28S      | C2791    |           |  |  |  |
| TNPO2    | U41        | U41_Ts6692         | tar_cand_6692_124_55147   | 70       | 55147    | CD       | 28S      | U4276    |           |  |  |  |
| RPL23A   | U42B       | U42B_Ts30652       | tar_cand_30652_122_177079 | 66       | 177079   | CD       | 18S      | U116     |           |  |  |  |
|          | mgh18S-121 | mgh18S-121_Ts30650 | tar_cand_30650_179_60013  | 69       | 60013    | CD       | 18S      | U        | 121       |  |  |  |
|          |            | mgh18S-121_Ts37991 | tar_cand_37991_108_715    | 68       | 715      | CD       |          |          |           |  |  |  |
| RPL3     | U43        | U43_Ts28288        | tar_cand_28288_136_12632  | 63       | 12632    | CD       | 18S      | C1703    |           |  |  |  |
|          | U83B       | U83B_Ts28287       | tar_cand_28287_143_5231   | 92       | 5231     | CD       | ?        |          |           |  |  |  |
| <b>1</b> | <b>2</b>   | <b>3</b>           | <b>4</b>                  | <b>5</b> | <b>6</b> | <b>7</b> | <b>8</b> | <b>9</b> | <b>10</b> |  |  |  |
| AL110141 | U44        | U44_Ts16451        | tar_cand_16451_109_250383 | 63       | 250383   | CD       | 18S      | A166     |           |  |  |  |
|          | U47        | U47_Ts16454        | tar_cand_16454_175_46841  | 66       | 46841    | CD       | 28S      | C3866    |           |  |  |  |
|          |            | U47_Ts18172        | tar_cand_18172_74_21      | 66       | 21       | CD       |          |          |           |  |  |  |



|                      |          |                  |                           |    |        |    |     |       |     |       |  |  |
|----------------------|----------|------------------|---------------------------|----|--------|----|-----|-------|-----|-------|--|--|
|                      | U74      | U74_Ts16447      | tar_cand_16447_110_4278   | 66 | 4278   | CD | 28S | C3820 |     |       |  |  |
|                      | U75      | U75_Ts16448      | tar_cand_16448_91_1871    | 60 | 1871   | CD | 28S | C4032 |     |       |  |  |
|                      | U76      | U76_Ts16449      | tar_cand_16449_221_6532   | 80 | 6532   | CD | 28S | A2350 |     |       |  |  |
|                      | U77      | U77_Ts16450      | tar_cand_16450_85_2242    | 70 | 2242   | CD | 28S | A1521 |     |       |  |  |
|                      | U79      | U79_Ts16452      | tar_cand_16452_130_30413  | 83 | 30413  | CD | 28S | A3809 |     |       |  |  |
|                      | U80      | U80_Ts16453      | tar_cand_16453_161_839361 | 78 | 839361 | CD | 28S | A1521 | 28S | G1612 |  |  |
|                      | U81      | U81_Ts16455      | tar_cand_16455_133_49130  | 77 | 49130  | CD | 28S | A391  |     |       |  |  |
|                      |          |                  |                           |    |        |    |     |       |     |       |  |  |
| RABGGTB              | U45A     | U45A_Ts14375     | tar_cand_14375_132_41502  | 83 | 41502  | CD | 18S | A159  | 18S | U172  |  |  |
|                      | U45B     | U45B_Ts14376     | tar_cand_14376_104_10859  | 71 | 10859  | CD | 18S | U172  |     |       |  |  |
|                      | U45C     | U45C_Ts14374     | tar_cand_14374_123_7618   | 78 | 7618   | CD | 18S | A159  |     |       |  |  |
| DKFZ<br>p686123148   | U49A     | U49A_Ts31576     | tar_cand_31576_122_32990  | 71 | 32990  | CD | 28S | C4426 |     |       |  |  |
|                      | U49B     | U49B_Ts31577     | tar_cand_31577_190_13592  | 48 | 13592  | CD | 28S | C4426 |     |       |  |  |
|                      | HBII-135 | HBII-135_Ts31575 | tar_cand_31575_126_15265  | 73 | 15265  | CD | 18S | U627  |     |       |  |  |
|                      |          |                  |                           |    |        |    |     |       |     |       |  |  |
| EST cluster          | U50      | U50_Ts36232      | tar_cand_36232_279_84356  | 72 | 84356  | CD | 28S | C2848 | 28S | G2863 |  |  |
|                      | U50B     | U50B_Ts36231     | tar_cand_36231_185_4261   | 72 | 4261   | CD | ?   |       |     |       |  |  |
|                      |          |                  |                           |    |        |    |     |       |     |       |  |  |
| WD-repeat protien 43 | U53      | U53_Ts16645      | tar_cand_16645_115_99568  | 78 | 99568  | CD | 28S | C3848 |     |       |  |  |
|                      |          | U53_Ts16644      | tar_cand_16644_114_851    | 78 | 851    | CD |     |       |     |       |  |  |
|                      |          |                  |                           |    |        |    |     |       |     |       |  |  |
| RPL17                | U58B     | U58B_Ts6028      | tar_cand_6028_111_1062    | 65 | 1062   | CD | 28S | G4198 |     |       |  |  |

|             | U58C | U58C_Ts6032  | tar_cand_6032_110_56372      | 65  | 56372 | CD   | 28S  | U4197 | 28S      | G4198 |    |  |
|-------------|------|--------------|------------------------------|-----|-------|------|------|-------|----------|-------|----|--|
| 1           | 2    | 3            | 4                            | 5   | 6     | 7    | 8    |       | 9        |       | 10 |  |
| ATP5B       | U59A | U59A_Ts38371 | tar_cand_38371_233_2892      | 75  | 2892  | CD   | 18S  | A1031 |          |       |    |  |
|             |      |              |                              |     |       |      |      |       |          |       |    |  |
| EST cluster | U60  | U60_Ts8732   | tar_cand_8732_212_3251       | 83  | 3251  | CD   | 28S  | G4340 |          |       |    |  |
|             |      |              |                              |     |       |      |      |       |          |       |    |  |
| RBMX        | U61  | U61_Ts35223  | tar_cand_35223_144_6919<br>9 | 72  | 69199 | CD   | 18S  | U1442 |          |       |    |  |
|             |      |              |                              |     |       |      |      |       |          |       |    |  |
| AB011087    | U62B | U62B_Ts5534  | tar_cand_5534_140_561        | 86  | 561   | CD   | 18S  | A590  |          |       |    |  |
|             |      | U62B_Ts5535  | tar_cand_5535_114_679        | 86  | 679   | CD   |      |       |          |       |    |  |
|             |      |              |                              |     |       |      |      |       |          |       |    |  |
| HSPA9B      | U63  | U63_Ts17280  | tar_cand_17280_113_2947<br>8 | 70  | 29478 | CD   | 28S  | A4541 |          |       |    |  |
|             |      |              |                              |     |       |      |      |       |          |       |    |  |
| RPS2        | U64  | U64_Ts6209   | tar_cand_6209_181_6468       | 133 | 6468  | HACA | 28S  | U4975 |          |       |    |  |
|             |      |              |                              |     |       |      |      |       |          |       |    |  |
| RPL12       | U65  | U65_Ts6246   | tar_cand_6246_194_35514      | 137 | 35514 | HACA | 28S  | U4373 | 28S      | U4427 |    |  |
|             |      |              |                              |     |       |      |      |       |          |       |    |  |
| RPL18A      | U68  | U68_Ts6836   | tar_cand_6836_232_56181      | 131 | 56181 | HACA | 28S  | U4393 |          |       |    |  |
|             |      |              |                              |     |       |      |      |       |          |       |    |  |
| RPL39       | U69  | U69_Ts39563  | tar_cand_39563_170_182       | 133 | 182   | HACA | 18S  | U36   | 5.8<br>S | U69   |    |  |
|             |      |              |                              |     |       |      |      |       |          |       |    |  |
| RAB30       | U70E | U70E_Ts7006  | tar_cand_7006_229_2204       | 133 | 2204  | HACA | 18S  | U1692 |          |       |    |  |
|             |      | U70E_Ts7740  | tar_cand_7740_100_167        | 96  | 167   | HACA |      |       |          |       |    |  |
|             | U72  | U72_Ts18975  | tar_cand_18975_197_1051      | 131 | 1051  | HACA | 5.8S | U55   |          |       |    |  |

|             |          |              |                          |          |          |          |          |          |           |     |  |  |
|-------------|----------|--------------|--------------------------|----------|----------|----------|----------|----------|-----------|-----|--|--|
| spliced EST | U71d     | U71d_Ts17449 | tar_cand_17449_181_457   | 138      | 457      | HACA     | 18S      | U406     |           |     |  |  |
| RPS3a       | U73a     | U73a_Ts6962  | tar_cand_6962_119_89395  | 69       | 89395    | CD       | ?        |          |           |     |  |  |
|             | U73b     | U73b_Ts6965  | tar_cand_6965_115_381809 | 80       | 381809   | CD       | ?        |          |           |     |  |  |
| <b>1</b>    | <b>2</b> | <b>3</b>     | <b>4</b>                 | <b>5</b> | <b>6</b> | <b>7</b> | <b>8</b> | <b>9</b> | <b>10</b> |     |  |  |
| BAT1        | U83      | U83_Ts32239  | tar_cand_32239_144_22320 | 77       | 22320    | CD       | ?        |          |           |     |  |  |
|             | U84      | U84_Ts32241  | tar_cand_32241_134_918   | 78       | 918      | CD       | ?        |          |           |     |  |  |
| CNAP1       | U85      | U85_Ts27009  | tar_cand_27009_358_513   | 328      | 513      | SCARNA10 | U5       | U46      | U5        | C45 |  |  |
| APG16L      | U87      | U87_Ts28627  | tar_cand_28627_286_587   | 277      | 587      | SCARNA5  | U5       | U41      | U4        | A65 |  |  |
|             | U88      | U88_Ts28625  | tar_cand_28625_278_916   | 269      | 916      | SCARNA6  | U5       | U41      |           |     |  |  |
| KPNA4       | U90      | U90_Ts12228  | tar_cand_12228_343_379   | 323      | 379      | SCARNA7  | U1       | A70      |           |     |  |  |
| FAM29A      | U92      | U92_Ts27329  | tar_cand_27329_176_728   | 131      | 728      | SCARNA8  | U2       | U34      | U2        | U44 |  |  |
| FLJ20758    | U94      | U94_Ts32123  | tar_cand_32123_302_24427 | 138      | 24427    | CD       | U6       | C62      |           |     |  |  |
| EIF4G2      | U97      | U97_Ts34103  | tar_cand_34103_191_782   | 137      | 782      | CD       | ?        |          |           |     |  |  |
| LOC751071   | U99      | U99_Ts2429   | tar_cand_2429_218_13097  | 148      | 13097    | HACA     | 18S      | U1004    |           |     |  |  |
|             |          | U99_Ts18920  | tar_cand_18920_214_27    | 149      | 27       | HACA     |          |          |           |     |  |  |

|           |          |                  |                         |          |          |              |          |          |           |  |  |  |  |
|-----------|----------|------------------|-------------------------|----------|----------|--------------|----------|----------|-----------|--|--|--|--|
|           |          | U99_Ts37130      | tar_cand_37130_154_316  | 148      | 316      | HACA         |          |          |           |  |  |  |  |
| FLJ20516  | U100     | U100_Ts19801     | tar_cand_19801_214_1141 | 137      | 1141     | SCARNA1<br>4 | U2       | U7       |           |  |  |  |  |
| PUM1      | U103B    | U103B_Ts30095    | tar_cand_30095_155_1835 | 88       | 1835     | CD           | 18S      | G601     |           |  |  |  |  |
|           |          | U103B_Ts30097    | tar_cand_30097_117_1157 | 87       | 1157     | CD           |          |          |           |  |  |  |  |
|           | HBII-251 | HBII-251_Ts30094 | tar_cand_30094_110_1106 | 75       | 1106     | CD           | 18S      | G601     |           |  |  |  |  |
| C20orf199 | U106     | U106_Ts327       | tar_cand_327_140_27081  | 82       | 27081    | CD           | ?        |          |           |  |  |  |  |
|           | HBII-99B | HBII-99B_Ts331   | tar_cand_331_208_279928 | 91       | 279928   | CD           | 28S      | G3878    |           |  |  |  |  |
| <b>1</b>  | <b>2</b> | <b>3</b>         | <b>4</b>                | <b>5</b> | <b>6</b> | <b>7</b>     | <b>8</b> | <b>9</b> | <b>10</b> |  |  |  |  |
| MAGED2    | U107     | U107_Ts16018     | tar_cand_16018_99_59    | 80       | 59       | HACA         | ?        |          |           |  |  |  |  |
| CWF19L1   | U108     | U108_Ts3963      | tar_cand_3963_298_460   | 139      | 460      | HACA         | ?        |          |           |  |  |  |  |
| MGC23909  | U109     | U109_Ts21817     | tar_cand_21817_181_257  | 136      | 257      | SCARNA1<br>8 | U1       | U6       |           |  |  |  |  |
| D28589    | HBI-6    | HBI-6_Ts1552     | tar_cand_1552_157_226   | 122      | 226      | HACA         | 28S      | U4522    |           |  |  |  |  |
| HTR2C     | HBI-36   | HBI-36_Ts10619   | tar_cand_10619_185_2749 | 128      | 2749     | HACA         | ?        |          |           |  |  |  |  |
| SNX5      | HBI-43   | HBI-43_Ts21606   | tar_cand_21606_284_6492 | 235      | 6492     | CD           | 28S      | U3797    |           |  |  |  |  |
| RFWD2     | HBI-100  | HBI-100_Ts2176   | tar_cand_2176_198_7511  | 141      | 7511     | SCARNA3      | U6       | U40      |           |  |  |  |  |

|                             |          |                 |                           |          |          |          |           |          |           |  |  |  |  |
|-----------------------------|----------|-----------------|---------------------------|----------|----------|----------|-----------|----------|-----------|--|--|--|--|
| SNURF-SNRNP-UBE3A antisense | HBII-52  | HBII-52_Ts9480  | tar_cand_9480_331_319500  | 82       | 319500   | CD       | serotonin |          |           |  |  |  |  |
|                             |          | HBII-52_Ts23742 | tar_cand_23742_133_160433 | 82       | 160433   | CD       |           |          |           |  |  |  |  |
|                             |          | HBII-52_Ts23798 | tar_cand_23798_133_877    | 82       | 877      | CD       |           |          |           |  |  |  |  |
|                             |          | HBII-52_Ts23783 | tar_cand_23783_106_4687   | 82       | 4687     | CD       |           |          |           |  |  |  |  |
|                             |          | HBII-52_Ts23772 | tar_cand_23772_81_220     | 82       | 220      | CD       |           |          |           |  |  |  |  |
|                             |          | HBII-52_Ts23767 | tar_cand_23767_138_372    | 81       | 372      | CD       |           |          |           |  |  |  |  |
|                             |          | HBII-52_Ts23752 | tar_cand_23752_81_125     | 81       | 125      | CD       |           |          |           |  |  |  |  |
|                             |          | HBII-52_Ts23708 | tar_cand_23708_134_2081   | 82       | 2081     | CD       |           |          |           |  |  |  |  |
|                             |          | HBII-52_Ts23740 | tar_cand_23740_124_22202  | 82       | 22202    | CD       |           |          |           |  |  |  |  |
|                             |          | HBII-52_Ts23696 | tar_cand_23696_111_502    | 82       | 502      | CD       |           |          |           |  |  |  |  |
|                             |          | HBII-52_Ts23700 | tar_cand_23700_137_28863  | 82       | 28863    | CD       |           |          |           |  |  |  |  |
| <b>1</b>                    | <b>2</b> | <b>3</b>        | <b>4</b>                  | <b>5</b> | <b>6</b> | <b>7</b> | <b>8</b>  | <b>9</b> | <b>10</b> |  |  |  |  |
|                             |          | HBII-52_Ts23686 | tar_cand_23686_102_4597   | 82       | 4597     | CD       |           |          |           |  |  |  |  |
|                             |          | HBII-52_Ts23690 | tar_cand_23690_97_618     | 81       | 618      | CD       |           |          |           |  |  |  |  |
|                             |          | HBII-52_Ts23788 | tar_cand_23788_160_1024   | 72       | 1024     | CD       |           |          |           |  |  |  |  |
|                             |          | HBII-52_Ts23793 | tar_cand_23793_81_62      | 81       | 62       | CD       |           |          |           |  |  |  |  |
|                             |          | HBII-52_Ts23685 | tar_cand_23685_82_67      | 81       | 67       | CD       |           |          |           |  |  |  |  |
|                             |          | HBII-52_Ts23765 | tar_cand_23765_191_133    | 82       | 133      | CD       |           |          |           |  |  |  |  |
|                             |          | HBII-52_Ts23823 | tar_cand_23823_104_43     | 82       | 43       | CD       |           |          |           |  |  |  |  |
|                             |          | HBII-52_Ts23709 | tar_cand_23709_133_43     | 144      | 43       | CD       |           |          |           |  |  |  |  |
|                             |          | HBII-52_Ts23703 | tar_cand_23703_115_1125   | 76       | 1125     | CD       |           |          |           |  |  |  |  |
|                             |          | HBII-52_Ts23717 | tar_cand_23717_125_2229   | 82       | 2229     | CD       |           |          |           |  |  |  |  |
|                             |          | HBII-52_Ts23730 | tar_cand_23730_102_300    | 82       | 300      | CD       |           |          |           |  |  |  |  |

|          |          |                 |                          |          |          |          |          |          |           |  |  |  |
|----------|----------|-----------------|--------------------------|----------|----------|----------|----------|----------|-----------|--|--|--|
|          |          | HBII-52_Ts23731 | tar_cand_23731_122_6441  | 81       | 6441     | CD       |          |          |           |  |  |  |
|          |          | HBII-52_Ts23736 | tar_cand_23736_176_9338  | 82       | 9338     | CD       |          |          |           |  |  |  |
|          |          | HBII-52_Ts23739 | tar_cand_23739_81_616    | 81       | 616      | CD       |          |          |           |  |  |  |
|          |          | HBII-52_Ts23744 | tar_cand_23744_105_1178  | 82       | 1178     | CD       |          |          |           |  |  |  |
|          |          | HBII-52_Ts23750 | tar_cand_23750_134_8403  | 82       | 8403     | CD       |          |          |           |  |  |  |
|          |          | HBII-52_Ts23711 | tar_cand_23711_100_202   | 82       | 202      | CD       |          |          |           |  |  |  |
|          |          | HBII-52_Ts23778 | tar_cand_23778_266_231   | 82       | 231      | CD       |          |          |           |  |  |  |
|          |          | HBII-52_Ts23784 | tar_cand_23784_166_4967  | 82       | 4967     | CD       |          |          |           |  |  |  |
|          |          | HBII-52_Ts23785 | tar_cand_23785_83_22     | 82       | 22       | CD       |          |          |           |  |  |  |
|          |          | HBII-52_Ts23844 | tar_cand_23844_101_907   | 81       | 907      | CD       |          |          |           |  |  |  |
|          |          | HBII-52_Ts23754 | tar_cand_23754_385_552   | 82       | 552      | CD       |          |          |           |  |  |  |
|          |          | HBII-52_Ts23751 | tar_cand_23751_109_1793  | 81       | 1793     | CD       |          |          |           |  |  |  |
|          |          | HBII-52_Ts23826 | tar_cand_23826_130_10914 | 81       | 10914    | CD       |          |          |           |  |  |  |
|          |          | HBII-52_Ts23828 | tar_cand_23828_137_175   | 79       | 175      | CD       |          |          |           |  |  |  |
|          |          | HBII-52_Ts23829 | tar_cand_23829_79_24     | 80       | 24       | CD       |          |          |           |  |  |  |
|          |          | HBII-52_Ts31048 | tar_cand_31048_230_671   | 72       | 671      | CD       |          |          |           |  |  |  |
| <b>1</b> | <b>2</b> | <b>3</b>        | <b>4</b>                 | <b>5</b> | <b>6</b> | <b>7</b> | <b>8</b> | <b>9</b> | <b>10</b> |  |  |  |
|          |          | HBII-52_Ts31050 | tar_cand_31050_210_5496  | 74       | 5496     | CD       |          |          |           |  |  |  |
|          |          | HBII-52_Ts31063 | tar_cand_31063_73_140    | 73       | 140      | CD       |          |          |           |  |  |  |
|          |          | HBII-52_Ts31075 | tar_cand_31075_110_1618  | 72       | 1618     | CD       |          |          |           |  |  |  |
|          |          | HBII-52_Ts31083 | tar_cand_31083_70_93     | 70       | 93       | CD       |          |          |           |  |  |  |
|          |          | HBII-52_Ts31158 | tar_cand_31158_160_235   | 79       | 235      | CD       |          |          |           |  |  |  |
|          |          | HBII-52_Ts31089 | tar_cand_31089_92_20     | 79       | 20       | CD       |          |          |           |  |  |  |
|          |          | HBII-52_Ts31092 | tar_cand_31092_152_11879 | 81       | 11879    | CD       |          |          |           |  |  |  |

|          |          |                 |                               |          |          |          |          |          |           |  |  |  |
|----------|----------|-----------------|-------------------------------|----------|----------|----------|----------|----------|-----------|--|--|--|
|          |          | HBII-52_Ts31116 | tar_cand_31116_82_55          | 80       | 55       | CD       |          |          |           |  |  |  |
|          |          | HBII-52_Ts31127 | tar_cand_31127_182_33         | 80       | 33       | CD       |          |          |           |  |  |  |
|          |          | HBII-52_Ts31118 | tar_cand_31118_220_378        | 81       | 378      | CD       |          |          |           |  |  |  |
|          |          | HBII-52_Ts31135 | tar_cand_31135_120_103        | 79       | 103      | CD       |          |          |           |  |  |  |
|          |          | HBII-52_Ts31155 | tar_cand_31155_102_363        | 81       | 363      | CD       |          |          |           |  |  |  |
|          |          | HBII-52_Ts31165 | tar_cand_31165_94_1049        | 81       | 1049     | CD       |          |          |           |  |  |  |
|          |          | HBII-52_Ts31149 | tar_cand_31149_97_88          | 81       | 88       | CD       |          |          |           |  |  |  |
|          |          | HBII-52_Ts23832 | tar_cand_23832_146_3123       | 81       | 3123     | CD       |          |          |           |  |  |  |
|          |          | HBII-52_Ts23834 | tar_cand_23834_86_169         | 82       | 169      | CD       |          |          |           |  |  |  |
|          |          | HBII-52_Ts23841 | tar_cand_23841_205_8109       | 81       | 8109     | CD       |          |          |           |  |  |  |
|          |          | HBII-52_Ts31154 | tar_cand_31154_112_240        | 82       | 240      | CD       |          |          |           |  |  |  |
|          |          | HBII-52_Ts31157 | tar_cand_31157_126_117        | 80       | 117      | CD       |          |          |           |  |  |  |
|          |          | HBII-52_Ts31246 | tar_cand_31246_209_1137<br>82 | 79       | 113782   | CD       |          |          |           |  |  |  |
|          |          | HBII-52_Ts31109 | tar_cand_31109_263_5116       | 82       | 5116     | CD       |          |          |           |  |  |  |
|          |          | HBII-52_Ts31088 | tar_cand_31088_81_148         | 81       | 148      | CD       |          |          |           |  |  |  |
|          |          | HBII-52_Ts32573 | tar_cand_32573_272_7560       | 82       | 7560     | CD       |          |          |           |  |  |  |
|          |          | HBII-52_Ts32575 | tar_cand_32575_230_6019<br>0  | 82       | 60190    | CD       |          |          |           |  |  |  |
|          |          | HBII-52_Ts32586 | tar_cand_32586_136_1956<br>4  | 82       | 19564    | CD       |          |          |           |  |  |  |
|          |          | HBII-52_Ts32589 | tar_cand_32589_102_683        | 82       | 683      | CD       |          |          |           |  |  |  |
|          |          | HBII-52_Ts32591 | tar_cand_32591_368_1007<br>5  | 82       | 10075    | CD       |          |          |           |  |  |  |
|          |          | HBII-52_Ts32599 | tar_cand_32599_135_1272<br>3  | 82       | 12723    | CD       |          |          |           |  |  |  |
| <b>1</b> | <b>2</b> | <b>3</b>        | <b>4</b>                      | <b>5</b> | <b>6</b> | <b>7</b> | <b>8</b> | <b>9</b> | <b>10</b> |  |  |  |
|          |          | HBII-52_Ts32601 | tar_cand_32601_120_2826       | 81       | 2826     | CD       |          |          |           |  |  |  |
|          |          | HBII-52_Ts32604 | tar_cand_32604_104_1752       | 82       | 17524    | CD       |          |          |           |  |  |  |

|  |  |                 |                              |    |       |    |  |  |  |  |  |  |  |
|--|--|-----------------|------------------------------|----|-------|----|--|--|--|--|--|--|--|
|  |  |                 | 4                            |    |       |    |  |  |  |  |  |  |  |
|  |  | HBII-52_Ts32607 | tar_cand_32607_80_53         | 80 | 53    | CD |  |  |  |  |  |  |  |
|  |  | HBII-52_Ts32621 | tar_cand_32621_82_122        | 82 | 122   | CD |  |  |  |  |  |  |  |
|  |  | HBII-52_Ts32626 | tar_cand_32626_92_2208       | 81 | 2208  | CD |  |  |  |  |  |  |  |
|  |  | HBII-52_Ts32629 | tar_cand_32629_144_4604<br>9 | 82 | 46049 | CD |  |  |  |  |  |  |  |
|  |  | HBII-52_Ts32630 | tar_cand_32630_117_1009      | 82 | 1009  | CD |  |  |  |  |  |  |  |
|  |  | HBII-52_Ts32631 | tar_cand_32631_136_1419<br>1 | 82 | 14191 | CD |  |  |  |  |  |  |  |
|  |  | HBII-52_Ts32633 | tar_cand_32633_131_8472      | 82 | 8472  | CD |  |  |  |  |  |  |  |
|  |  | HBII-52_Ts32634 | tar_cand_32634_140_565       | 82 | 565   | CD |  |  |  |  |  |  |  |
|  |  | HBII-52_Ts32635 | tar_cand_32635_121_316       | 82 | 316   | CD |  |  |  |  |  |  |  |
|  |  | HBII-52_Ts32637 | tar_cand_32637_107_60        | 81 | 60    | CD |  |  |  |  |  |  |  |
|  |  | HBII-52_Ts32639 | tar_cand_32639_96_387        | 82 | 387   | CD |  |  |  |  |  |  |  |
|  |  | HBII-52_Ts32640 | tar_cand_32640_87_69         | 81 | 69    | CD |  |  |  |  |  |  |  |
|  |  | HBII-52_Ts32649 | tar_cand_32649_82_381        | 80 | 381   | CD |  |  |  |  |  |  |  |
|  |  | HBII-52_Ts32652 | tar_cand_32652_202_1127<br>9 | 82 | 11279 | CD |  |  |  |  |  |  |  |
|  |  | HBII-52_Ts32657 | tar_cand_32657_154_1474      | 82 | 1474  | CD |  |  |  |  |  |  |  |
|  |  | HBII-52_Ts32660 | tar_cand_32660_138_4915      | 82 | 4915  | CD |  |  |  |  |  |  |  |
|  |  | HBII-52_Ts32666 | tar_cand_32666_93_670        | 82 | 670   | CD |  |  |  |  |  |  |  |
|  |  | HBII-52_Ts32667 | tar_cand_32667_167_302       | 80 | 302   | CD |  |  |  |  |  |  |  |
|  |  | HBII-52_Ts32684 | tar_cand_32684_79_194        | 78 | 194   | CD |  |  |  |  |  |  |  |
|  |  | HBII-52_Ts32685 | tar_cand_32685_117_2238      | 81 | 2238  | CD |  |  |  |  |  |  |  |
|  |  | HBII-52_Ts32691 | tar_cand_32691_81_26         | 81 | 26    | CD |  |  |  |  |  |  |  |
|  |  | HBII-52_Ts32694 | tar_cand_32694_188_87        | 81 | 87    | CD |  |  |  |  |  |  |  |
|  |  | HBII-52_Ts32698 | tar_cand_32698_164_580       | 82 | 580   | CD |  |  |  |  |  |  |  |



|          |          |                 |                              |          |          |          |          |          |           |  |  |  |
|----------|----------|-----------------|------------------------------|----------|----------|----------|----------|----------|-----------|--|--|--|
|          |          | HBII-52_Ts32704 | tar_cand_32704_278_210       | 82       | 210      | CD       |          |          |           |  |  |  |
|          |          | HBII-52_Ts32712 | tar_cand_32712_126_2435      | 82       | 2435     | CD       |          |          |           |  |  |  |
|          |          | HBII-52_Ts32721 | tar_cand_32721_106_1074      | 82       | 1074     | CD       |          |          |           |  |  |  |
| <b>1</b> | <b>2</b> | <b>3</b>        | <b>4</b>                     | <b>5</b> | <b>6</b> | <b>7</b> | <b>8</b> | <b>9</b> | <b>10</b> |  |  |  |
|          |          | HBII-52_Ts23723 | tar_cand_23723_243_343       | 82       | 343      | CD       |          |          |           |  |  |  |
|          |          | HBII-52_Ts32580 | tar_cand_32580_186_3851      | 81       | 3851     | CD       |          |          |           |  |  |  |
|          |          | HBII-52_Ts32605 | tar_cand_32605_106_2630      | 82       | 2630     | CD       |          |          |           |  |  |  |
|          |          | HBII-52_Ts32682 | tar_cand_32682_144_2239      | 81       | 2239     | CD       |          |          |           |  |  |  |
|          |          | HBII-52_Ts23802 | tar_cand_23802_82_175        | 82       | 175      | CD       |          |          |           |  |  |  |
|          |          | HBII-52_Ts31159 | tar_cand_31159_79_273        | 79       | 273      | CD       |          |          |           |  |  |  |
|          |          | HBII-52_Ts23825 | tar_cand_23825_224_1736<br>9 | 81       | 17369    | CD       |          |          |           |  |  |  |
|          |          | HBII-52_Ts32615 | tar_cand_32615_83_227        | 81       | 227      | CD       |          |          |           |  |  |  |
|          |          | HBII-52_Ts23697 | tar_cand_23697_83_2637       | 79       | 2637     | CD       |          |          |           |  |  |  |
|          |          | HBII-52_Ts23682 | tar_cand_23682_80_64         | 80       | 64       | CD       |          |          |           |  |  |  |
|          |          | HBII-52_Ts32596 | tar_cand_32596_80_51         | 80       | 51       | CD       |          |          |           |  |  |  |
|          |          | HBII-52_Ts23812 | tar_cand_23812_83_4565       | 62       | 4565     | CD       |          |          |           |  |  |  |
|          |          | HBII-52_Ts31181 | tar_cand_31181_72_200        | 72       | 200      | CD       |          |          |           |  |  |  |
|          |          | HBII-52_Ts23843 | tar_cand_23843_71_143        | 71       | 143      | CD       |          |          |           |  |  |  |
|          |          | HBII-52_Ts31152 | tar_cand_31152_65_36         | 64       | 36       | CD       |          |          |           |  |  |  |
|          |          | HBII-52_Ts23845 | tar_cand_23845_62_171        | 62       | 171      | CD       |          |          |           |  |  |  |
|          |          | HBII-52_Ts23842 | tar_cand_23842_60_29         | 59       | 29       | CD       |          |          |           |  |  |  |
|          |          | HBII-52_Ts31139 | tar_cand_31139_264_79        | 79       | 79       | CD       |          |          |           |  |  |  |
|          |          | HBII-52_Ts23821 | tar_cand_23821_237_2265      | 81       | 2265     | CD       |          |          |           |  |  |  |
|          |          | HBII-52_Ts23839 | tar_cand_23839_116_30        | 48       | 30       | CD       |          |          |           |  |  |  |

|          |            |                    |                               |          |          |          |          |          |           |  |  |  |
|----------|------------|--------------------|-------------------------------|----------|----------|----------|----------|----------|-----------|--|--|--|
|          |            | HBII-52_Ts23779    | tar_cand_23779_53_28          | 53       | 28       | CD       |          |          |           |  |  |  |
|          |            | HBII-52_Ts31057    | tar_cand_31057_268_50         | 61       | 50       | CD       |          |          |           |  |  |  |
|          |            | HBII-52_Ts31051    | tar_cand_31051_195_866        | 81       | 866      | CD       |          |          |           |  |  |  |
|          |            | HBII-52_Ts32713    | tar_cand_32713_144_158        | 82       | 158      | CD       |          |          |           |  |  |  |
|          |            | HBII-52_Ts31070    | tar_cand_31070_135_2338       | 82       | 2338     | CD       |          |          |           |  |  |  |
|          |            | HBII-52_Ts32644    | tar_cand_32644_96_1054        | 81       | 1054     | CD       |          |          |           |  |  |  |
|          |            | HBII-52_Ts32715    | tar_cand_32715_77_20          | 60       | 20       | CD       |          |          |           |  |  |  |
| <b>1</b> | <b>2</b>   | <b>3</b>           | <b>4</b>                      | <b>5</b> | <b>6</b> | <b>7</b> | <b>8</b> | <b>9</b> | <b>10</b> |  |  |  |
|          | HBII-85-25 | HBII-85-25_Ts31247 | tar_cand_31247_181_7226       | 94       | 7226     | CD       | ?        |          |           |  |  |  |
|          |            | HBII-85-25_Ts31251 | tar_cand_31251_255_1280<br>24 | 94       | 128024   | CD       | ?        |          |           |  |  |  |
|          |            | HBII-85-25_Ts31248 | tar_cand_31248_154_2014<br>70 | 94       | 201470   | CD       | ?        |          |           |  |  |  |
|          |            | HBII-85-25_Ts31249 | tar_cand_31249_163_4713<br>7  | 94       | 47137    | CD       | ?        |          |           |  |  |  |
|          |            |                    |                               |          |          |          |          |          |           |  |  |  |
|          | HBII-436   | HBII-436_Ts27686   | tar_cand_27686_324_2083<br>9  | 72       | 20839    | CD       | ?        |          |           |  |  |  |
|          | HBII-438B  | HBII-438B_Ts33982  | tar_cand_33982_112_7056       | 67       | 7056     | CD       | ?        |          |           |  |  |  |
| SF3B3    | HBII-82    | HBII-82_Ts26370    | tar_cand_26370_133_3001       | 90       | 3001     | CD       | 28S      | G3923    |           |  |  |  |
|          | HBII-82B   | HBII-82B_Ts26369   | tar_cand_26369_100_1973       | 80       | 1973     | CD       | 28S      | G3923    |           |  |  |  |
|          |            |                    |                               |          |          |          |          |          |           |  |  |  |
| NOP5     | HBII-95B   | HBII-95B_Ts28687   | tar_cand_28687_136_5196<br>0  | 87       | 51960    | CD       | 18S      | G509     |           |  |  |  |
|          |            | HBII-95B_Ts28686   | tar_cand_28686_245_3765<br>0  | 88       | 37650    | CD       |          |          |           |  |  |  |
|          | HBII-234   | HBII-234_Ts28689   | tar_cand_28689_114_3309       | 87       | 3309     | CD       | 18S      | A512     |           |  |  |  |
|          |            | HBII-234_Ts28690   | tar_cand_28690_117_9813       | 85       | 9813     | CD       |          |          |           |  |  |  |
|          |            |                    |                               |          |          |          |          |          |           |  |  |  |

|            |           |                   |                           |          |          |          |          |       |          |       |           |  |
|------------|-----------|-------------------|---------------------------|----------|----------|----------|----------|-------|----------|-------|-----------|--|
| GNL3       | HBII-108  | HBII-108_Ts14163  | tar_cand_14163_111_12096  | 76       | 12096    | CD       | 18S      | G683  |          |       |           |  |
|            | HBII-108B | HBII-108B_Ts14164 | tar_cand_14164_205_1935   | 82       | 1935     | CD       | 18S      | G683  |          |       |           |  |
|            | HBII-210  | HBII-210_Ts14165  | tar_cand_14165_174_161947 | 77       | 161947   | CD       | 28S      | G4464 |          |       |           |  |
|            |           |                   |                           |          |          |          |          |       |          |       |           |  |
| GLTSCR2    | HBII-115  | HBII-115_Ts39790  | tar_cand_39790_109_103    | 109      | 103      | CD       | ?        |       |          |       |           |  |
|            |           |                   |                           |          |          |          |          |       |          |       |           |  |
| EIF4G1     | HBII-142  | HBII-142_Ts25470  | tar_cand_25470_282_19890  | 76       | 19890    | CD       | 18S      | C1272 |          |       |           |  |
|            |           |                   |                           |          |          |          |          |       |          |       |           |  |
| ch-TOG     | HBII-166  | HBII-166_Ts28968  | tar_cand_28968_163_335179 | 111      | 335179   | CD       | U6       | C60   |          |       |           |  |
|            |           |                   |                           |          |          |          |          |       |          |       |           |  |
| RPL13      | HBII-202  | HBII-202_Ts4086   | tar_cand_4086_279_4719    | 71       | 4719     | CD       | 18S      | U428  | 28S      | A2388 |           |  |
| <b>1</b>   | <b>2</b>  | <b>3</b>          | <b>4</b>                  | <b>5</b> | <b>6</b> | <b>7</b> | <b>8</b> |       | <b>9</b> |       | <b>10</b> |  |
| AP1G1      | HBII-239  | HBII-239_Ts34514  | tar_cand_34514_173_6542   | 86       | 6542     | CD       | 5.8S     | U14   |          |       |           |  |
|            |           |                   |                           |          |          |          |          |       |          |       |           |  |
| RPL37      | HBII-240  | HBII-240_Ts10273  | tar_cand_10273_101_1905   | 83       | 1905     | CD       | 28S      | U4590 |          |       |           |  |
|            |           |                   |                           |          |          |          |          |       |          |       |           |  |
| AY264285   | HBII-276  | HBII-276_Ts30962  | tar_cand_30962_237_21783  | 76       | 21783    | CD       | 28S      | G3723 |          |       |           |  |
|            |           |                   |                           |          |          |          |          |       |          |       |           |  |
| MNAB/OR1K1 | HBII-295  | HBII-295_Ts25467  | tar_cand_25467_116_91031  | 97       | 91031    | CD       | ?        |       |          |       |           |  |
| FLJ10534   | HBII-296A | HBII-296A_Ts19449 | tar_cand_19449_125_6200   | 92       | 6200     | CD       | 28S      | G4588 |          |       |           |  |
|            |           |                   |                           |          |          |          |          |       |          |       |           |  |
| D26488     | HBII-316  | HBII-316_Ts16646  | tar_cand_16646_136_242459 | 89       | 242459   | CD       | 28S      | A3846 |          |       |           |  |
|            |           |                   |                           |          |          |          |          |       |          |       |           |  |

|              |           |                   |                           |          |          |          |          |          |           |  |  |  |
|--------------|-----------|-------------------|---------------------------|----------|----------|----------|----------|----------|-----------|--|--|--|
| CCAR1        | HBII-419  | HBII-419_Ts38909  | tar_cand_38909_115_128505 | 68       | 128505   | CD       | 18S      | G867     |           |  |  |  |
|              |           |                   |                           |          |          |          |          |          |           |  |  |  |
| EST cluster  | snR38A    | snR38A_Ts5610     | tar_cand_5610_87_503      | 72       | 503      | CD       | 28S      | G4362    |           |  |  |  |
|              | snR38B    | snR38B_Ts5609     | tar_cand_5609_123_6234    | 88       | 6234     | CD       | 28S      | G4362    |           |  |  |  |
|              | snR38C    | snR38C_Ts5608     | tar_cand_5608_130_4197    | 80       | 4197     | CD       | 28S      | G4362    |           |  |  |  |
|              |           |                   |                           |          |          |          |          |          |           |  |  |  |
| n-cod MEG8   | 14q(I-3)  | 14q(I-3)_Ts21762  | tar_cand_21762_107_92719  | 71       | 92719    | CD       | ?        |          |           |  |  |  |
|              | 14q(I-4)  | 14q(I-4)_Ts21765  | tar_cand_21765_149_75009  | 75       | 75009    | CD       | ?        |          |           |  |  |  |
|              | 14q(I-6)  | 14q(I-6)_Ts21768  | tar_cand_21768_119_106637 | 74       | 106637   | CD       | ?        |          |           |  |  |  |
|              | 14q(I-7)  | 14q(I-7)_Ts21769  | tar_cand_21769_116_68936  | 76       | 68936    | CD       | ?        |          |           |  |  |  |
|              | 14q(I-8)  | 14q(I-8)_Ts21770  | tar_cand_21770_127_143358 | 73       | 143358   | CD       | ?        |          |           |  |  |  |
|              | 14q(I-9)  | 14q(I-9)_Ts21771  | tar_cand_21771_116_104059 | 71       | 104059   | CD       | ?        |          |           |  |  |  |
|              | 14q(II-1) | 14q(II-1)_Ts21772 | tar_cand_21772_103_31345  | 71       | 31345    | CD       | ?        |          |           |  |  |  |
|              | 14q(II-3) | 14q(II-3)_Ts21773 | tar_cand_21773_100_29443  | 74       | 29443    | CD       | ?        |          |           |  |  |  |
|              |           |                   |                           |          |          |          |          |          |           |  |  |  |
| SNRPB        | SNORD119  | SNORD119_Ts9360   | tar_cand_9360_171_6103    | 82       | 6103     | CD       | 28S      | A4560    |           |  |  |  |
| <b>1</b>     | <b>2</b>  | <b>3</b>          | <b>4</b>                  | <b>5</b> | <b>6</b> | <b>7</b> | <b>8</b> | <b>9</b> | <b>10</b> |  |  |  |
| UBAP2        | SNORD121A | SNORD121A_Ts30747 | tar_cand_30747_108_3826   | 91       | 3826     | CD       | 28S      | G4607    |           |  |  |  |
|              |           |                   |                           |          |          |          |          |          |           |  |  |  |
|              | SNORD121B | SNORD121B_Ts30748 | tar_cand_30748_94_917     | 73       | 917      | CD       | 28S      | G4607    |           |  |  |  |
|              |           |                   |                           |          |          |          |          |          |           |  |  |  |
| THRAP4/MED24 | SNORD124  | SNORD124_Ts4547   | tar_cand_4547_173_2768    | 108      | 2768     | CD       | ?        |          |           |  |  |  |

|             |                |                   |                          |     |       |         |     |       |    |     |  |  |  |
|-------------|----------------|-------------------|--------------------------|-----|-------|---------|-----|-------|----|-----|--|--|--|
| AP1B1       | SNORD125       | SNORD125_Ts35282  | tar_cand_35282_113_25706 | 94  | 25706 | CD      | ?   |       |    |     |  |  |  |
| CCNB1IP1    | SNORD126       | SNORD126_Ts23875  | tar_cand_23875_110_2122  | 77  | 2122  | CD      | ?   |       |    |     |  |  |  |
| PRPF39      | SNORD127       | SNORD127_Ts22820  | tar_cand_22820_126_12646 | 87  | 12646 | CD      | 18S | G1447 |    |     |  |  |  |
| MAGED4      | SNORA11D       | SNORA11D_Ts9295   | tar_cand_9295_190_16655  | 126 | 16655 | HACA    | ?   |       |    |     |  |  |  |
| IARS        | SNORA84        | SNORA84_Ts3732    | tar_cand_3732_197_34476  | 132 | 34476 | HACA    | ?   |       |    |     |  |  |  |
| AB051518    | mgU2-19/30/Z32 | mgU2-19/30_Ts3876 | tar_cand_3876_363_19838  | 267 | 19838 | SCARNA9 | U2  | G19   | U2 | A30 |  |  |  |
|             | mgU2-25/61     | mgU2-25/61_Ts3658 | tar_cand_3658_241_20843  | 236 | 20843 | SCARNA2 | U2  | G25   | U2 | C61 |  |  |  |
| AB046784    | mgU6-53B       | mgU653B_Ts24620   | tar_cand_24620_176_93986 | 109 | 93986 | CD      | U6  | A53   |    |     |  |  |  |
|             |                | mgU653B_Ts24621   | tar_cand_24621_138_531   | 109 | 531   | CD      |     |       |    |     |  |  |  |
| EST cluster | mgU6-47        | mgU6-47_Ts40664   | tar_cand_40664_148_47024 | 96  | 47024 | CD      | U6  | A47   |    |     |  |  |  |

**Supplementary Table 3.** Tarsier miRNAs and their tarsier homologs

| <b>human miRNA</b> | <b>tarsier miRNA</b> | <b>draft name</b>        |
|--------------------|----------------------|--------------------------|
| hsa-mir-30e        | tsy-mir-30e          | tar_cand_29159_74_6176   |
| hsa-mir-30c-1      | tsy-mir-30c-1        | tar_cand_29158_80_12464  |
| hsa-mir-9-1        | tsy-mir-9-1          | tar_cand_4807_135_28545  |
| hsa-mir-488        | tsy-mir-488          | tar_cand_10209_60_31     |
| hsa-mir-181a-1     | tsy-mir-181a-1       | tar_cand_15720_82_40047  |
| hsa-mir-29c        | tsy-mir-29c          | tar_cand_33118_168_12736 |
| hsa-mir-29b-2      | tsy-mir-29b-2        | tar_cand_33119_326_16670 |

|               |               |                         |
|---------------|---------------|-------------------------|
| hsa-mir-26b   | tsy-mir-26b   | tar_cand_20298_57_417   |
| hsa-mir-153-1 | tsy-mir-153-1 | tar_cand_22919_56_326   |
| hsa-mir-149   | tsy-mir-149   | tar_cand_3840_99_94967  |
| hsa-mir-885   | tsy-mir-885   | tar_cand_21449_59_4832  |
| hsa-mir-26a-1 | tsy-mir-26a-1 | tar_cand_33189_94_30382 |
| hsa-mir-425   | tsy-mir-425   | tar_cand_32909_93_4578  |
| hsa-mir-191   | tsy-mir-191   | tar_cand_32908_74_65273 |

|                |               |                          |
|----------------|---------------|--------------------------|
| hsa-let-7g     | tsy-let-7g    | tar_cand_12031_212_9767  |
| hsa-mir-16-2   | tsy-mir-16-2  | tar_cand_12227_158_1124  |
| hsa-mir-218-1  | tsy-mir-218-1 | tar_cand_12846_153_2965  |
| hsa-mir-1973   | tsy-mir-1973  | tar_cand_3422_142_136    |
| hsa-mir-874    | tsy-mir-874   | tar_cand_26579_83_101    |
| hsa-mir-103a-1 | tsy-mir-103-1 | tar_cand_13781_154_60929 |
| hsa-mir-218-2  | tsy-mir-218-2 | tar_cand_13793_67_2912   |



|              |              |                         |
|--------------|--------------|-------------------------|
| hsa-mir-340  | tsy-mir-340  | tar_cand_2340_69_998    |
| hsa-mir-339  | tsy-mir-339  | tar_cand_11845_63_1442  |
| hsa-mir-590  | tsy-mir-590  | tar_cand_37447_285_1402 |
| hsa-mir-93   | tsy-mir-93   | tar_cand_4955_67_929    |
| hsa-mir-106b | tsy-mir-106b | tar_cand_4954_106_1317  |
| hsa-mir-335  | tsy-mir-335  | tar_cand_6925_121_726   |
| hsa-mir-490  | tsy-mir-490  | tar_cand_13881_111_360  |

|               |               |                         |
|---------------|---------------|-------------------------|
| hsa-mir-151a  | tsy-mir-151   | tar_cand_5778_116_4555  |
| hsa-mir-101-2 | tsy-mir-101-2 | tar_cand_6827_62_14699  |
| hsa-mir-491   | tsy-mir-491   | tar_cand_11447_68_612   |
| hsa-mir-7-1   | tsy-mir-7-1   | tar_cand_2371_131_1040  |
| hsa-let-7a-1  | tsy-let-7a-1  | tar_cand_21871_223_9892 |
| hsa-let-7f-1  | tsy-let-7f-1  | tar_cand_21872_126_4842 |
| hsa-mir-628   | tsy-mir-628   | tar_cand_27738_159_707  |

|                |                |                          |
|----------------|----------------|--------------------------|
| hsa-let-7e     | tsy-let-7e     | tar_cand_37865_77_11397  |
| hsa-mir-125a   | tsy-mir-125a   | tar_cand_37866_173_76186 |
| hsa-mir-99a    | tsy-mir-99a    | tar_cand_3997_193_54354  |
| hsa-let-7c     | tsy-let-7c     | tar_cand_3996_171_2976   |
| hsa-mir-125b-2 | tsy-mir-125b-2 | tar_cand_3992_111_166833 |
| hsa-mir-185    | tsy-mir-185    | tar_cand_21490_58_3703   |
| hsa-mir-33a    | tsy-mir-33a    | tar_cand_24250_61_62     |

|              |                |                          |
|--------------|----------------|--------------------------|
| hsa-mir-1249 | tsy-mir-1249   | tar_cand_14745_185_131   |
| hsa-let-7a-3 | tsy-mir-21871  | tar-cand-21871-223-9892  |
| hsa_can_1288 | tsy_can_1288-1 | tar_cand_20618_71_759    |
|              | tsy_can_1288-2 | tar_cand_7957_152_188455 |
|              | tsy_can_1288-3 | tar_cand_36874_108_477   |
|              | tsy_can_1288-4 | tar_cand_22213_71_29     |
|              | tsy_can_1288-5 | tar_cand_7098_90_229228  |

|             |                 |                         |
|-------------|-----------------|-------------------------|
|             | tsy_can_1288-8  | tar_cand_18346_58_194   |
|             | tsy_can_1288-9  | tar_cand_23569_53_226   |
|             | tsy_can_1288-11 | tar_cand_6695_71_188999 |
| hsa-let-7d  | tsy-let-7d      | tar_cand_21873_296_8694 |
| hsa-mir-455 | tsy-mir-455     | tar_cand_18483_63_2757  |
| hsa-mir-126 | tsy-mir-126     | tar_cand_39833_110_9715 |
| hsa-mir-221 | tsy-mir-221     | tar_cand_37624_82_2376  |

|              |              |                        |
|--------------|--------------|------------------------|
|              |              | tar_cand_37625_87_3626 |
| hsa-mir-98   | tsy-mir-98   | tar_cand_7333_82_1015  |
| hsa-let-7f-2 | tsy-let-7f-2 | tar_cand_7332_94_5012  |
| hsa-mir-545  | tsy-mir-545  | tar_cand_15746_168_32  |
| hsa-mir-361  | tsy-mir-361  | tar_cand_23549_97_821  |
| hsa-mir-1264 | tsy-mir-1264 | tar_cand_10622_64_159  |
| hsa-mir-1298 | tsy-mir-1298 | tar_cand_10625_74_44   |

|              |              |                        |
|--------------|--------------|------------------------|
| hsa-mir-448  | tsy-mir-448  | tar_cand_25859_78_210  |
| hsa-mir-767  | tsy-mir-767  | tar_cand_6513_57_39    |
| hsa-mir-1296 | tsy-mir-1296 | tar_cand_16713_68_315  |
| hsa-mir-346  | tsy-mir-346  | tar_cand_8702_62_218   |
| hsa-mir-107  | tsy-mir-107  | tar_cand_7350_77_21210 |
| hsa_can_1424 | tsy_can_1424 | tar_cand_29273_65_75   |
| hsa-mir-192  | tsy-mir-192  | tar_cand_7213_63_777   |

|                |                |                           |
|----------------|----------------|---------------------------|
| hsa-mir-139    | tsy-mir-139    | tar_cand_35112_84_7168    |
| hsa-mir-125b-1 | tsy-mir-125b-1 | tar_cand_16250_192_166649 |
| hsa-let-7a-2   | tsy-let-7a-2   | tar_cand_16274_87_9539    |
| hsa-mir-148b   | tsy-mir-148b   | tar_cand_2497_154_296     |
| hsa-mir-26a-2  | tsy-mir-26a-2  | tar_cand_3694_238_30219   |
| hsa-mir-331    | tsy-mir-331    | tar_cand_22186_365_980    |
| hsa-mir-16-1   | tsy-mir-16-1   | tar_cand_25714_274_14341  |



|              |              |                         |
|--------------|--------------|-------------------------|
| hsa-mir-342  | tsy-mir-342  | tar_cand_7325_71_29529  |
| hsa_can_1288 | tsy-can_1288 | tar_cand_16678_120_3379 |
| hsa-mir-326  | tsy-mir-326  | tar_cand_9690_211_895   |
| mir-100      | tsy-mir-100  | tar_cand_16276_185_8669 |
| MIR25        | tsy-MIR25    | tar_cand_4956_60_129    |
| MIR488       | tsy-MIR488   | tar_cand_10170_60_31    |
| MIR504       | tsy-MIR504   | tar_cand_9008_57_266    |

|        |            |                        |
|--------|------------|------------------------|
| Mir350 | tsy-Mir350 | tar_cand_33923_64_91   |
| MIR764 | tsy-MIR764 | tar_cand_10620_63_123  |
| MIR652 | tsy-MIR652 | tar_cand_25568_52_1257 |

**Supplementary Table 4.** A summary of repeat elements specific to the tarsier genome

| Families                | Family number    | Copy number<br>x1000 | Full length copies | Total Length (Mb) | % of Genome   | Tarsus specific x1000 | Active families |
|-------------------------|------------------|----------------------|--------------------|-------------------|---------------|-----------------------|-----------------|
| <b>LINEs</b>            | <b>148</b>       | <b>981,73</b>        | <b>1,02</b>        | <b>666,47</b>     | <b>19,57%</b> | <b>54,39</b>          | <b>9</b>        |
| L1                      | L1M              | 84                   | 442,64             | 0,058             | 263,85        | 7,75%                 |                 |
|                         | L1P              | 32                   | 49,47              | 0,003             | 29,35         | 0,86%                 | 4,70            |
|                         | L1_TS            | 7                    | 342,70             | 0,929             | 336,74        | 9,89%                 | 49,69           |
|                         | LINE2            | 4                    | 124,68             | -                 | 31,65         | 0,93%                 |                 |
|                         | LINE3/CR1        | 15                   | 14,63              | 0,028             | 3,03          | 0,09%                 |                 |
|                         | Other            | 6                    | 7,61               | 0,002             | 1,85          | 0,05%                 |                 |
| <b>SINEs</b>            | <b>16</b>        | <b>1.696,70</b>      | <b>936,87</b>      | <b>410,15</b>     | <b>12,04%</b> | <b>175,40</b>         | <b>5</b>        |
| Alu                     | Alu-TS           | 3                    | 1.257,80           | 855,008           | 337,91        | 9,92%                 | 168,10          |
|                         | AluJ             | 2                    | 142,80             | 48,119            | 31,53         | 0,93%                 |                 |
|                         | Monomers         | 3                    | 56,73              | 25,886            | 7,19          | 0,21%                 | 7,30            |
| MIR                     | MIRm             | 2                    | 210,88             | 7,399             | 30,45         | 0,89%                 |                 |
|                         | MIR3             | 1                    | 26,56              | 0,411             | 2,82          | 0,08%                 |                 |
|                         | Other            | 5                    | 1,93               | 0,044             | 0,25          | 0,01%                 |                 |
| <b>TINE-pseudogenes</b> | <b>3</b>         | <b>30,49</b>         | <b>28,496</b>      | <b>2,38</b>       | <b>0,07%</b>  | <b>4,66</b>           | <b>2</b>        |
| <b>LTR-retroposons</b>  | <b>260</b>       | <b>447,39</b>        | <b>0,088</b>       | <b>197,04</b>     | <b>5,79%</b>  | <b>5,88</b>           | <b>12</b>       |
|                         | ERV class I      | 140                  | 110,68             | 0,029             | 64,57         | 1,90%                 | 3,52            |
|                         | ERV(K) class II  | 19                   | 34,84              | 0,016             | 23,51         | 0,69%                 | 1,15            |
|                         | ERV(L) class III | 54                   | 104,57             | 0,012             | 44,23         | 1,30%                 | 0,30            |
|                         | MaLR             | 37                   | 189,14             | 0,031             | 62,86         | 1,85%                 | 0,91            |
|                         | Other            | 10                   | 8,16               | -                 | 1,87          | 0,05%                 |                 |
| <b>DNA-transposons</b>  | <b>219</b>       | <b>368,35</b>        | <b>69,258</b>      | <b>89,52</b>      | <b>2,63%</b>  | <b>1,08</b>           | <b>8</b>        |
|                         | MuDR             | 5                    | 1,72               | 0,027             | 0,66          | 0,02%                 |                 |
|                         | Piggi-Bac        | 4                    | 1,33               | 0,017             | 0,31          | 0,01%                 |                 |
|                         | hAT              | 6                    | 7,22               | 2,000             | 1,01          | 0,03%                 |                 |
| hAT                     | BlackJack        | 8                    | 13,91              | 4,246             | 2,64          | 0,08%                 |                 |
|                         | Charlie          | 70                   | 190,38             | 42,124            | 37,49         | 1,10%                 | 0,76            |
|                         | Tip100-Zaphod    | 30                   | 24,51              | 2,457             | 5,48          | 0,16%                 |                 |
| Tc1                     | TcMar            | 3                    | 0,98               | 0,019             | 0,12          | 0,00%                 |                 |
|                         | Tc2              | 1                    | 0,98               | 0,003             | 0,28          | 0,01%                 |                 |

|                                          |            |                 |                 |                 |               |               |           |
|------------------------------------------|------------|-----------------|-----------------|-----------------|---------------|---------------|-----------|
| Pogo                                     | 1          | 0,03            | 0,005           | 0,01            | 0,00%         |               |           |
| Tigger                                   | 51         | 86,82           | 16,185          | 32,15           | 0,94%         | 0,20          | 3         |
| Mariner                                  | 5          | 36,48           | 1,825           | 8,75            | 0,26%         | 0,12          | 2         |
| RC/Helitron                              | 4          | 1,31            | 0,019           | 0,27            | 0,01%         |               |           |
| Other                                    | 31         | 2,68            | 0,331           | 0,35            | 0,01%         |               |           |
| <b>small RNA pseudogenes</b>             | <b>65</b>  | <b>12,99</b>    | <b>4,421</b>    | <b>1,25</b>     | <b>0,03%</b>  | <b>1,72</b>   |           |
| tRNA                                     | 47         | 1,63            | 0,896           | 0,09            | 0,00%         |               |           |
| U-RNA                                    | 11         | 4,09            | 2,274           | 0,38            | 0,01%         | 0,82          |           |
| Other                                    | 7          | 7,27            | 1,251           | 0,78            | 0,02%         | 0,90          |           |
| <b>Unclassified</b>                      | <b>29</b>  | <b>1,85</b>     | <b>0,013</b>    | <b>0,296</b>    | <b>0,01%</b>  |               |           |
| <b>Sattelite</b>                         |            |                 |                 | <b>42,332</b>   | <b>1,24%</b>  |               |           |
| <b>Simple/Low complecity</b>             |            |                 |                 | <b>83,972</b>   | <b>2,47%</b>  |               |           |
| <b>Sattelite, Simple, Low complecity</b> |            |                 |                 | <b>126,305</b>  | <b>3,71%</b>  |               |           |
| <b>Total</b>                             | <b>740</b> | <b>3.539,50</b> | <b>1.040,16</b> | <b>1.493,41</b> | <b>43,85%</b> | <b>243,13</b> | <b>36</b> |

**Supplementary Table 5.** Tarsier scaffold sequence coordinates for the numt positions for various species

| <b>Primate specific numt location</b> |
|---------------------------------------|
| scaffold_5015 18357-18535             |

| <b>Mouse lemur specific numt scaffold coordinates</b> |
|-------------------------------------------------------|
| scaffold_1807 139276-139448                           |
| scaffold_3153 82365-82554                             |
| scaffold_343 85814-86010                              |
| scaffold_410 208267-208442                            |
| scaffold_79 718054-718237                             |

**Supplementary Table 6.** Comparative numt positions of primate species used to verify tarsier numt locations

| <b>Human numt coordinates</b> | <b>Numts</b>     | <b>Locations</b>     |
|-------------------------------|------------------|----------------------|
| chr2:33992538-33992593        | HSA_NumtS_050_b1 | 5'-UTR               |
| chr3:25508995-25509033        | HSA_NumtS_133_b1 | intron/5'-UTR        |
| chr5:73071717-73071757        | HSA_NumtS_214_b1 | intron               |
| chr20:13147959-13148001       | HSA_NumtS_544_b1 | intergenic           |
| chr22:36281719-36281765       | HSA_NumtS_560_b1 | intron/5'-UTR        |
| chr13:110076472-110076727     | HSA_NumtS_472_b1 | intergenic           |
| chr1:38077348-38077421        | HSA_NumtS_009_b1 | 3'-UTR               |
| chr5:165957424-165957466      | HSA_NumtS_232_b1 | intergenic           |
| chr8:100508098-100508181      | HSA_NumtS_319_b1 | intron               |
| chr4:47774289-47774381        | HSA_NumtS_179_b1 | 3'-UTR/intron/5'-UTR |
| chr11:73221706-73221868       | HSA_NumtS_398_b1 | 5'-UTR               |
| chr11:122874314-122874385     | HSA_NumtS_410_b1 | intergenic           |
| chr12:41757437-41757525       | HSA_NumtS_426_b1 | intron               |
| chr20:9149571-9149612         | HSA_NumtS_543_b1 | 5'-UTR               |
| chr20:55639110-55639179       | HSA_NumtS_546_b1 | intergenic           |

|                          |                  |               |
|--------------------------|------------------|---------------|
| chr2:81893601-81893852   | HSA_NumtS_058_b1 | 3'-UTR        |
| chr7:145694426-145694521 | HSA_NumtS_289_b1 | intergenic    |
| chr18:45379617-45379808  | HSA_NumtS_522_b1 | 3'-UTR/intron |
| chr17:51183094-51183746  | HSA_NumtS_513_b1 | intergenic    |
| chr4:56194327-56194457   | HSA_NumtS_182_b1 | intergenic    |
| chr13:56545768-56545893  | HSA_NumtS_464_b1 | intergenic    |
| chr17:42075084-42075151  | HSA_NumtS_512_b1 | 5'-UTR        |

| <b>Rheus macaque numt coordinates</b> | <b>Locations</b> |
|---------------------------------------|------------------|
| chr1:215872927-215873137              | intergenic       |
| chr11:130692898-130693035             | intergenic       |
| chr12:81781081-81781311               | intergenic       |
| chr14:90613401-90613633               | intergenic       |
| chr19:49842963-49843088               | intergenic       |
| chr20:707323-707682                   | intron           |
| chr20:22031226-22031350               | intergenic       |
| chr20:75142863-75143048               | intergenic       |
| chr3:119563855-119564027              | intergenic       |
| chr3:91233920-91234290                | intergenic       |
| chr5:64025193-64025548                | intergenic       |
| chr7:59771551-59771682                | intergenic       |
| chr8:100168419-100168678              | intergenic       |
| chr9:67885501-67885637                | intergenic       |
| chr9:114026008-114026145              | intergenic       |
| chrX:65478830-65478988                | intergenic       |

| <b>Marmoset numt coordinates</b> | <b>Locations</b> |
|----------------------------------|------------------|
| chr1:199813559-199814107         | intergenic       |
| chr11:129455234-129455860        | intergenic       |
| chr12:100355784-100355905        | intergenic       |

|                          |            |
|--------------------------|------------|
| chr16:73532845-73532996  | intergenic |
| chr16:74005431-74005618  | intergenic |
| chr18:28397992-28398324  | intergenic |
| chr20:37203021-37203271  | intergenic |
| chr4:30482948-30483064   | intergenic |
| chr4:69887632-69887777   | intergenic |
| chr5:105755984-105756252 | intergenic |
| chr7:4760158-4760443     | intergenic |
| chr7:37947789-37947942   | intergenic |
| chr8:49043875-49044101   | intergenic |
| chr8:118531084-118531601 | intergenic |

**Supplementary Table 7.** Tarsier genes under positive selection for branch site tests

|          |          |              |         |
|----------|----------|--------------|---------|
| ALKBH1   | GCHFR    | LOC103276389 | SGCG    |
| ANKRD16  | GPR26    | LOH12CR1     | SHC4    |
| APEH     | GRXCR2   | LRR1         | SHISA2  |
| APOBR    | GSX1     | LRRC71       | SHISA3  |
| ARL10    | HINT3    | LRWD1        | SKAP1   |
| ATG10    | HSD17B14 | LYPD4        | SLC14A2 |
| ATP6V1E2 | HTR6     | LYZ          | SLC35F6 |
| BBS2     | ICAM3    | MAB21L3      | SLC51B  |
| BFSP2    | IDUA     | MCL1         | SLC7A9  |
| BPIFA2   | IL18R1   | MRPL51       | SNX15   |
| C15orf26 | IL1A     | MTAP         | SOGA3   |
| CACNG2   | IL22RA1  | MURC         | SPATA24 |
| CBX7     | IMPG1    | MVD          | SRD5A3  |
| CCDC115  | IPPK     | MZT1         | STXBP3  |
| CCDC68   | KCTD2    | NEIL3        | TAC1    |
| CCDC70   | KHDRBS2  | NEU2         | TBKBP1  |
| CD248    | KIAA0101 | NGB          | TCAP    |

|          |              |              |          |
|----------|--------------|--------------|----------|
| CHP2     | KLF7         | NPPC         | TCP11L2  |
| CLVS2    | LAMTOR2      | NSMCE2       | TIMM50   |
| CNIH2    | LHFPL2       | NUBP2        | TMC8     |
| CNTRL    | LOC103249508 | OAF          | TMEM109  |
| CPA6     | LOC103249803 | OTUB2        | TMEM154  |
| CRHBP    | LOC103250458 | PDGFB        | TMEM179B |
| CRYL1    | LOC103250912 | PDLIM3       | TMEM182  |
| DDX20    | LOC103252421 | PFN2         | TMEM70   |
| DECR2    | LOC103254319 | PIFO         | TMPRSS12 |
| DKK4     | LOC103256425 | PLAC9        | TREM1    |
| DLX2     | LOC103257868 | PMCH         | TRMT11   |
| DNAJC5B  | LOC103259314 | PNPLA4       | TSHB     |
| DNAL1    | LOC103261001 | POLD4        | TTC38    |
| DNPH1    | LOC103261002 | PPAT         | TTF2     |
| DTD1     | LOC103261647 | PRL          | TYW3     |
| DTD2     | LOC103262295 | PSMB1        | UBE2S    |
| EIF3G    | LOC103262757 | PTPLAD2      | UPRT     |
| EIF4EBP1 | LOC103263294 | PTRH1        | UTP11L   |
| ELF3     | LOC103263575 | PTS          | VASH1    |
| F13B     | LOC103263722 | PTTG1IP      | VSTM2L   |
| FAM185A  | LOC103264564 | PTX3         | WDR77    |
| FAM216B  | LOC103264591 | PYURF        | WDYHV1   |
| FAM229B  | LOC103265837 | RASL11A      | WNT11    |
| FGF12    | LOC103266202 | <b>RBM43</b> | WTIP     |
| FICD     | LOC103266491 | REM1         | YIF1A    |
| FITM2    | LOC103266568 | RFTN2        | YIPF4    |
| GABRQ    | LOC103267768 | RGCC         | ZNF18    |
| GADD34   | LOC103269326 | RGR          | ZNF366   |
| GALNT7   | LOC103272308 | RNF139       | ZNF518B  |
| GAPT     | LOC103273909 | RNF5         | ZNF704   |
| GAS2L2   | LOC103276387 | RTP3         | ZP2      |



**Supplementary Table 8.** Diseases detected for genes deemed under positive selection within tarsier

| Disease                                                     | Impact                                         | Source                 | Gene(s)           | P-value | q-value<br>FDR B&H |
|-------------------------------------------------------------|------------------------------------------------|------------------------|-------------------|---------|--------------------|
| Factor XIII Deficiency                                      | cardiovascular                                 | CTD                    | F13B              | 0.014   | 0.040              |
| Infarction                                                  | cardiovascular                                 | CTD                    | PRL               | 0.007   | 0.027              |
| Hypotension                                                 | cardiovascular                                 | CTD                    | TAC1,<br>IL1A,PRL | 0.004   | 0.027              |
| Bradycardia                                                 | cardiovascular                                 | CTD                    | TAC1,PRL          | 0.004   | 0.027              |
| Dilated cardiomyopathy 1N                                   | cardiovascular                                 | Clinical<br>Variations | TCAP              | 0.007   | 0.027              |
| Primary familial hypertrophic cardiomyopathy                | cardiovascular                                 | Clinical<br>Variations | TCAP              | 0.014   | 0.040              |
| Galactorrhea                                                | endocrine (lactation)                          | CTD                    | PRL               | 0.007   | 0.027              |
| Gynecomastia                                                | endocrine (lactation)                          | CTD                    | PRL               | 0.014   | 0.040              |
| Puerperal Disorders                                         | endocrine (thyroid)                            | CTD                    | PRL               | 0.007   | 0.027              |
| Hypothyroidism, Congenital, Nongoitrous, 4                  | endocrine (thyroid)                            | CTD                    | TSHB              | 0.007   | 0.027              |
| Gingival Hyperplasia                                        | gums/mouth                                     | CTD                    | PDGFB             | 0.014   | 0.040              |
| Deafness, autosomal recessive 101                           | hearing                                        | Clinical<br>Variations | GRXCR2            | 0.007   | 0.027              |
| Chorioamnionitis                                            | immune                                         | CTD                    | IL1A              | 0.007   | 0.027              |
| Fever                                                       | immune                                         | CTD                    | IL1A,PRL          | 0.008   | 0.032              |
| Lymphoma, T-Cell, Cutaneous                                 | immune                                         | CTD                    | MCL1              | 0.014   | 0.040              |
| Multiple Myeloma                                            | immune                                         | CTD                    | MCL1,CBX7         | 0.016   | 0.046              |
| Cystinuria                                                  | kidney                                         | OMIM                   | SLC7A9            | 0.014   | 0.040              |
| Hurler syndrome                                             | lysosomal (musculoskeletal and visual impacts) | OMIM                   | IDUA              | 0.007   | 0.027              |
| Hurler-Scheie Syndrome                                      | lysosomal (musculoskeletal and visual impacts) | OMIM                   | IDUA              | 0.007   | 0.027              |
| Mucopolysaccharidosis I                                     | lysosomal (musculoskeletal and visual impacts) | CTD                    | IDUA              | 0.007   | 0.027              |
| Scheie Syndrome                                             | lysosomal (musculoskeletal and visual impacts) | OMIM                   | IDUA              | 0.007   | 0.027              |
| Immunodeficiency due to defect in mapbp-interacting protein | musculoskeletal                                | Clinical<br>Variations | LAMTOR2           | 0.007   | 0.027              |

| Disease                                                               | Impact                                            | Source              | Gene(s) | P-value | q-value<br>FDR B&H |
|-----------------------------------------------------------------------|---------------------------------------------------|---------------------|---------|---------|--------------------|
| Diaphyseal medullary stenosis with malignant fibrous histiocytoma     | musculoskeletal                                   | CTD                 | MTAP    | 0.007   | 0.027              |
| Myopathy, limb-girdle, with bone fragility                            | musculoskeletal                                   | CTD                 | MTAP    | 0.007   | 0.027              |
| Limb-girdle muscular dystrophy, type 2C                               | musculoskeletal                                   | CTD                 | SGCG    | 0.007   | 0.027              |
| Mental retardation, autosomal dominant 10                             | neurological                                      | Clinical Variations | CACNG2  | 0.007   | 0.027              |
| Epilepsy, familial temporal lobe, 5                                   | neurological                                      | Clinical Variations | CPA6    | 0.007   | 0.027              |
| Febrile seizures, familial, 11                                        | neurological                                      | Clinical Variations | CPA6    | 0.007   | 0.027              |
| Idiopathic basal ganglia calcification 5                              | neurological                                      | Clinical Variations | PDGFB   | 0.007   | 0.027              |
| Phobic Disorders                                                      | neurological                                      | CTD                 | PRL     | 0.014   | 0.040              |
| Sexual Dysfunction, Physiological                                     | neurological                                      | CTD                 | PRL     | 0.007   | 0.027              |
| 6-pyruvoyl-tetrahydropterin synthase deficiency                       | neurological                                      | CTD                 | PTS     | 0.007   | 0.027              |
| Hyperphenylalaninemia BH4-Deficient, A HPABH4A                        | neurological                                      | OMIM                | PTS     | 0.007   | 0.027              |
| Sialorrhea                                                            | neurological                                      | CTD                 | TAC1    | 0.007   | 0.027              |
| Kearns-Sayre Syndrome                                                 | neurological (musculoskeletal and visual impacts) | CTD                 | IL1A    | 0.014   | 0.040              |
| MERRF Syndrome                                                        | neurological (musculoskeletal and visual impacts) | CTD                 | IL1A    | 0.014   | 0.040              |
| Kahrizi syndrome                                                      | neurological (musculoskeletal and visual impacts) | Clinical Variations | SRD5A3  | 0.007   | 0.027              |
| Nuclearly-encoded mitochondrial complex V (ATP synthase) deficiency 2 | neuromuscular                                     | Clinical Variations | TMEM70  | 0.007   | 0.027              |
| Ciliary dyskinesia, primary, 16                                       | respiratory                                       | Clinical Variations | DNAL1   | 0.007   | 0.027              |
| Cutaneous nevi                                                        | skin                                              | GWAS                | MTAP    | 0.014   | 0.040              |
| Dermatofibrosarcoma protuberans                                       | skin                                              | Clinical Variations | PDGFB   | 0.007   | 0.027              |
| Epidermodysplasia Verruciformis                                       | skin                                              | CTD                 | TMC8    | 0.014   | 0.040              |
| Bardet-Biedl syndrome 2                                               | vision                                            | Clinical Variations | BBS2    | 0.007   | 0.027              |

| Disease                                        | Impact | Source                 | Gene(s) | P-value | q-value<br>FDR B&H |
|------------------------------------------------|--------|------------------------|---------|---------|--------------------|
| Cataract, Autosomal Dominant, Multiple Types 1 | vision | OMIM                   | BFSP2   | 0.007   | 0.027              |
| Macular dystrophy, vitelliform, 4              | vision | Clinical<br>Variations | IMPG1   | 0.007   | 0.027              |
| Retinitis pigmentosa 44                        | vision | Clinical<br>Variations | RGR     | 0.007   | 0.027              |
| Congenital disorder of glycosylation type 1Q   | vision | Clinical<br>Variations | SRD5A3  | 0.007   | 0.027              |

**Supplementary Table 9.** Tarsier orthologous gene sequences to human tested for significant associations with curated pathway databases

| Pathway Name                                               | Source                | Genes                                                              | Pathway Count | Observed Genes | Expected | Ratio of Enrichment | Raw P-Value | Adjusted P-Value |
|------------------------------------------------------------|-----------------------|--------------------------------------------------------------------|---------------|----------------|----------|---------------------|-------------|------------------|
| Metabolic pathways                                         | KEGG                  | ATP6V1E2 CRYL1 GALNT7<br>IDUA IPPK MTAP MVD POLD4<br>PPAT PTS UPRT | 1130          | 11             | 4.14     | 2.66                | 0.0031      | 0.0267           |
| MAPK signaling pathway                                     | KEGG                  | CACNG2 CHP2 FGF12 IL1A<br>PDGFB                                    | 268           | 5              | 0.98     | 5.09                | 0.0032      | 0.0267           |
| Cytokine-cytokine receptor interaction                     | KEGG                  | IL18R1 IL1A IL22RA1 PDGFB<br>PRL                                   | 265           | 5              | 0.97     | 5.15                | 0.003       | 0.0267           |
| Base excision repair                                       | KEGG                  | NEIL3 POLD4                                                        | 33            | 2              | 0.12     | 16.54               | 0.0065      | 0.0406           |
| Hypertrophy Model                                          | WikiPathways          | IL1A EIF4EBP1                                                      | 20            | 2              | 0.07     | 27.3                | 0.0024      | 0.0288           |
| Lymphocyte TarBase                                         | WikiPathways          | ARL10 GALNT7 MCL1 PTRH1<br>SNX15 TMEM109 UBE2S                     | 533           | 7              | 1.95     | 3.58                | 0.0036      | 0.0288           |
| negative regulation of fibroblast growth factor production | GO Biological Process | RGCC WNT11                                                         | 2             | 2              | 0.02     | 117.98              | 7.13E-05    | 0.0357           |
| positive regulation of mitosis                             | GO Cellular Component | IL1A NSMCE2 PDGFB RGCC                                             | 36            | 4              | 0.31     | 13.11               | 0.0002      | 0.0357           |

**Supplementary Table 10.** Species included in the analysis of positive selection

| Species                   |     | Version  | Source    | Date                |
|---------------------------|-----|----------|-----------|---------------------|
| <i>Homo sapiens</i>       | hsa | hg19     | CCDS/UCSC | download 30.07.2014 |
| <i>Pan troglodytes</i>    | ptr | 2.1.4.75 | Ensembl   | Nov 2012            |
| <i>Gorilla gorilla</i>    | ggo | 3.1.75   | Ensembl   | Jul 2011            |
| <i>Macaca mulatta</i>     | mac | 1.75     | Ensembl   | May 2010            |
| <i>Callithrix jacchus</i> | cja | 3.2.1.75 | Ensembl   | Feb 2014            |
| <i>Tarsius syrichta</i>   | tsy | 2.0.1    | NCBI      | Sep 2013            |
| <i>Otolemur garnettii</i> | oga | 3.75     | Ensembl   | Dec 2011            |
| <i>Tupaia belangeri</i>   | tbe | 1.75     | Ensembl   | Apr 2013            |

## Supplementary Methods

**RepeatMasker parameter settings.** For the numt insertional analysis, we used the Philippine tarsier mitochondrial genome (NC\_012774.1) with a user-defined library sequence (-lib): -e crossmatch -s -nolow -norna -lib. For RepeatMasker, the following parameters were used: -e crossmatch -species primates; settings for npcRNAs: -e crossmatch -lib; library (lib) containing predicted human micro and snoRNAs.

**Pairwise alignments.** The pairwise alignment (*Homo sapiens/Tarsius syrichta*-2.0.1) was based on the soft-masked human genome:

(hg19; <http://www.repeatmasker.org/species/hg.html>) and was generated as previously described at: ([http://genomewiki.ucsc.edu/index.php/Whole\\_genome\\_alignment\\_howto](http://genomewiki.ucsc.edu/index.php/Whole_genome_alignment_howto)) with the software provided by UCSC (<http://hgdownload.cse.ucsc.edu/admin/exe/>) in several steps.

**Multi-way alignments. The following steps were followed to align whole genome assemblies of targeted primates:**

(1) Alignment with LASTZ for each fasta-file of tarsier and human

```
lastz target.fasta query.fasta (result: *.lav-format file)
(target.fasta = tarsier genome; query.fasta = human genome)
```

(2) converting fasta into a 2bit-format

```
faToTwoBit *.fasta (result: target.2bit, query.2bit)
```

(3) converting the \*.lav-format file into psl-format

```
lavToPSL for i in `ls *.lav`; do lavToPsl $i ${i%.lav}.psl; done
```

(4) chaining

a) axtChain

```
for i in `ls *.psl`; do axtChain $i target.2bit query.2bit -scoreScheme='file-name' -
minScore=5000 -linearGap=medium -psl ${i%.psl}.chain
```

b) faSize (determining the file sizes of the fasta-files using a python script)

c) chainMergeSort (to merge and sort all chain-files into one file; default settings)

```
chainMergeSort *.chain > all.chain
```

d) chainPreNet (to filter the chain-file)

```
chainPreNet all.chain target.sizes query.sizes all.pre.chain
```

e) chain joining occurred under these threshold: axtChain; parameters

```
-chainMinScore = 3000 -chainLinearGap = medium
```

(5) netting

a) chainNet (combining chains into nets)

chainNet all.pre.chain target.sizes query.sizes all\_target.net all\_query.net  
b) netToAxt (to convert the net-format into the readable axt-format  
netToAxt all\_target.net all.pre.chain target.2bit query.2bit out.axt

The *Tarsius syrichta* genome (Version 2.0.1) along with the genomes of human (*Homo sapiens*; Dec. 2013; GRCh38/hg38), chimpanzee (*Pan troglodytes*; Feb. 2011; CSAC 2.1.4/panTro4), bonobo (*Pan paniscus*; May 2012; Max-Planck/panPan1), gorilla (*Gorilla gorilla*; May 2011; gorGor3.1/gorGor3), orangutan (*Pongo pygmaeus abelii*; Jul. 2007; WUGSC 2.0.2/ponAbe2), gibbon (*Nomascus leucogenys*; Oct. 2012; GGSC Nleu3.0/nomLeu3), rhesus macaque (*Macaca mulatta*; Oct. 2010; BGI CR\_1.0/rheMac3), crab-eating macaque (*Macaca fascicularis*; Jun. 2013; Macaca\_fascicularis\_5.0/macFas5), baboon (*Papio anubis*; Mar. 2012; Baylor Panu\_2.0/papAnu2), green (vervet) monkey (*Chlorocebus sabaues*; Mar. 2014; Chlorocebus\_sabeus 1.1/chlSab2), proboscis monkey (*Nasalis larvatus*; Nov. 2014; Charlie1.0/nasLar1), golden snubnosed monkey (*Rhinopithecus roxellana*; Oct. 2014; Rrox\_v1/rhiRox1), marmoset (*Callithrix jacchus*; Mar. 2009; WUGSC 3.2/calJac3), squirrel monkey (*Saimiri boliviensis*; Oct. 2011; Broad/saiBol1), mouse lemur (*Microcebus murinus*; Jul. 2007; Broad/micMur1), bushbaby (*Otolemur garnettii*; Mar. 2011; Broad/otoGar3), and tree shrew (*Tupaia belangeri*; Dec. 2006; Broad/tupBel1), mouse (*Mus musculus*; Dec. 2011; GRCh38/mm10) and dog (*Canis lupus familiaris*; Seq. 2011; Broad/canFam3) as outgroups were used in this alignment. The 20-way alignment is implemented in GPAC<sup>1</sup> and available at: <http://hgdownload.soe.ucsc.edu/goldenPath/tarSyr2/multiz20way/>.

**Positive gene selection.** For human, high-quality consensus CDS (CCDS) data were downloaded from the UCSC Table Browser<sup>2</sup> and translated into protein sequences using *transeq*<sup>3</sup> (settings: *transeq -sequence ccds -frame 1*). For the tarsier, we used the protein sequences and the rna.asn-file from: [ftp://ftp.ncbi.nlm.nih.gov/genomes/Tarsius\\_syrichta/](ftp://ftp.ncbi.nlm.nih.gov/genomes/Tarsius_syrichta/) to retrieve the CDS sequences through the use of a script (*asn2all*; settings: *./mac.asn2all -fd -o CDS\_from\_transcripts.fsa -i rna.asn*; NCBI C++ toolkit). To identify orthology groups we used orthoMCL<sup>4</sup>: *orthomclAdjustFasta*, *orthomclFilterFasta* with *min\_length=10*; *max\_percent\_stops=20*, all versus all blast of all good proteins (defined by *orthomclFilterFasta*) with *blastall -m 8 -z 218855 -F 'm S' -v 100000 -b 100000 -e 1e-5*, *orthomclBlastParser*.

**Pairwise Sequentially Markovian Coalescent (PSMC).** In SAMtools<sup>5</sup> we built the diploid.fq.gz file by applying the following command:

```
1) samtools mpileup -C50 -uf T_syrichta.fa T_syrichta.bam | bcftools call -c - \
|vcfutils.pl vcf2fq -d 10 -D 100 | gzip > diploid.fq.gz (for parameters, see SAMtools description
https://github.com/samtools/samtools)
```

In a local version of PSMC we ran the following commands (for parameters, see PSMC description <https://github.com/lh3/psmc>):

```
2) utils/fq2psmcfa -q20 diploid.fq.gz > diploid.psmcfa
3) psmc -N25 -t15 -r5 -p "4+25*2+4+6" -o diploid.psmc diploid.psmcfa
4) utils/psmc2history.pl diploid.psmc | utils/history2ms.pl > ms-cmd.sh
5) utils/psmc_plot.pl -g7 -u1.1e-08 diploid diploid.psmc
```

for "seven" years per generation (IUCN <http://www.iucnredlist.org/details/21492/0>) and the human mutation rate  $1.1e-08$ <sup>6,7</sup>.

To complete 100 rounds of bootstrapping, we split the long sequences into shorter fragments and randomly sampled them with replacement in PSMC:

```
6) ./utils/splitfa diploid.psmcfa > split.psmcfa
7) psmc -N25 -t15 -r5 -p "4+25*2+4+6" -o diploid.psmc diploid.psmcfa
8) seq 100 | xargs -I "{}" echo psmc -N25 -t15 -r5 -b -p "4+25*2+4+6" -o "round-{}.psmc"
split.psmcfa | sh
9) cat diploid.psmc round-*.psmc > combined.psmc
10) utils/psmc_plot.pl -g7 -u1.1e-8 combined combined.psmc
(for MacOSX we replaced xargs -i with xargs -I "{}")
```

To parallelize the PSMC run of bootstrap data, we replaced step **8**) with:

```
8) parallel -j10 "psmc -N25 -t15 -r5 -b -p "4+25*2+4+6" -o round-{}.psmc split.psmcfa" ::: <(seq
100)
(GNU parallel; ten processes run in parallel)
```



### **Numt-screening.**

*Primate specific numts:* It is not possible to detect species-specific numts solely by using the 46- and 20-way alignments (human as leading species) except for human. Therefore, we developed an approach based on the mouse lemur (micMur1)/mouse (mm10) pairwise alignment (micMur1.mm10.net.axt; <http://hgdownload.soe.ucsc.edu/goldenPath/micMur1/vsMm10/micMur1.mm10.net.axt.gz>). We screened this alignment for mouse lemur specific insertions greater or equal than 100 nt and allowed maximally 20 nt of mouse sequence within the corresponding region. With this approach, we detected 65,182 mouse lemur specific regions (gaps in mouse). These unique mouse lemur sequences were compared to RepeatMasker results (greater or equal than 100 nt) based on the mouse lemur genome (micMur1; <http://hgdownload.soe.ucsc.edu/goldenPath/micMur1/bigZips/micMur1.fa.gz>) as target and a dimeric (merging two mouse lemur mitochondrial genomes) version of the mouse lemur mtDNA (KR911907.1) as library (3,161 hits). Because mtDNA is a circular molecule, it is possible that numts can span the end and start region of the linear fasta sequence. Therefore, we used a dimeric mtDNA sequence as library. We allowed up to 100 nt non-mitochondrial flanking sequences in the mouse lemur specific sequence region at the 5' - and 3' -end. All hits were manually checked for orthologous regions in tarsier, marmoset, and gorilla using the UCSC Genome Browser<sup>8</sup>. Using the micMur1/mm10 pairwise alignment, we detected nine potential mouse lemur specific numts. By manual comparison to orthologous hits in tarsier, marmoset, and gorilla (UCSC Genome Browser), we confirmed one match as primate specific.

*Mouse lemur specific numts:* We used the mouse lemur (micMur1)/mouse (mm10) pairwise alignment (micMur1.mm10.net.axt; <http://hgdownload.soe.ucsc.edu/goldenPath/micMur1/vsMm10/micMur1.mm10.net.axt.gz>) to screen for inserts in mouse lemur equal or greater than 100 nt with not more than 20 nt orthologous mouse sequences (65,182). RepeatMasker was used to search these loci for mitochondrial sequences (micMur1 KR911907.1) (see above), revealing nine matches. These cases were reviewed using the UCSC Genome Browser (see above).

*Species-specific numts for human, rhesus macaque, and marmoset:* Screenings for human, rhesus macaque, and marmoset specific numts were performed using GPAC<sup>1</sup>. For human, we used the 46-way alignment, whereas for the remaining primate species we used different pairwise alignments (rhesus: rheMac3/hg19, <http://hgdownload.soe.ucsc.edu/goldenPath/rheMac3/vsHg19/rheMac3.hg19.net.axt.gz>; marmoset: calJac3/hg19, <http://hgdownload.soe.ucsc.edu/goldenPath/calJac3/vsHg19/calJac3.hg19.net.axt.gz>). Coordinates of human numts were downloaded from the UCSC Table Browser (<http://genome.ucsc.edu/cgi-bin/hgTables?command=start>; genome: Human, assembly: hg19, group: All Tracks, track: NumtS Sequence), whereas the numts coordinates of rhesus (rheMac3;

<http://hgdownload.soe.ucsc.edu/goldenPath/rheMac3/bigZips/rheMac3.fa.gz>) and marmoset (caljac3, <http://hgdownload.soe.ucsc.edu/goldenPath/calJac3/bigZips/calJac3.fa.gz>) were detected via RepeatMasker. The genomes of the rhesus macaque and marmoset were used as targets, and each two concatenated species-specific mtDNA genomes (rhesus: NC\_005943.1, marmoset: NC\_025586.1) as library sequences (see above) for a RepeatMasker run. Numts equal to or greater than 100 nt were used for further investigations (rhesus 779; marmoset 573). Each species-specific numt match with a clear GPAC presence/absence pattern was further confirmed in the UCSC Genome Browser for presence/absence in other primates. For that, we again used the 46-way alignment information in the case of human. The Chain/Net-Information (Comparative Genomics) of gorilla, orangutan, human, marmoset, tarsier, and mouse was used in the case of the rhesus macaque and the 14-way alignment (with marmoset as leading species) in the case of marmoset. The search for species-specific numts of human, rhesus macaque, and marmoset revealed 22, 16, and 14 matches, respectively (Supplementary Table 3).

*Internode numts*: For detecting internode numts on the lineage to human (internodes: Strepsirrhini-Tarsiiformes; Tarsiiformes-Anthroidea; Platyrrhini-Cercopithecoidea; Cercopithecoidea-Hominoidea), we used GPAC<sup>1</sup> and the 46-way alignment with human as leading species as database. For GPAC coordinates, we used the 766 numts listed from the UCSC Table Browser<sup>2</sup>. The GPAC analysis was performed using all primate species and tree shrew as an outgroup. Only clear presence/absence boundaries (+/-) were considered for further analyses. All potential numt insertion events were checked manually with the UCSC Genome Browser (see above).

**Analysis of introns and intergenic regions.** A total of 49,377,710 cDNAs were aligned to ~30,000 tarsier scaffolds to identify and annotate the entire small non protein-coding RNA (npcRNA) transcriptome. Of these, 45,749,647 mapped to the genome reference and were used for downstream analysis. For enrichment of small npcRNAs, we focused on genomic regions located outside known exons. Local extensions of introns and intergenic intervals were calculated based on the NCBI annotation file (ref\_Tarsius\_syrichta\_2.0.1\_top\_level.gff3). Intron sizes were minimized to exclude ambiguous cDNA assignments. Individual “samtools view” calls generated SAM output files to generate candidate contigs <sup>5</sup>. Based on cut-off values, specific regions (i.e., intron or intergenic sequences) were selected for downstream analysis and all introns or intergenic intervals that harbored at least twenty cDNAs were further processed. All computations were conducted using custom-designed S-Plus scripts.

In addition to the identification of known human npcRNAs via pairwise alignments, we utilized the number of cDNAs per assembled contig and the candidate length to differentiate background from reliably longer and more frequent candidates. We filtered the entire candidate dataset for RNAs >50 nt. All enrichments were computed based on simple gawk (<https://www.gnu.org/software/gawk/>) scripts. We also applied filters to remove cDNAs, which related to expressed mRNAs or incomplete processing intermediates of hnRNA (heteronuclear RNA) precursors. Finally, we selected 1,338 potential npcRNAs for downstream analysis.

### Supplementary References

- 1 Noll, A. *et al.* GPAC - Genome presence/absence compiler: A web application to comparatively visualize multiple genome-level changes. *Mol. Biol. Evol.* **32**, 275-286, doi:papers3://publication/doi/10.1093/molbev/msu276 (2015).
- 2 Karolchik, D. *et al.* The UCSC Table Browser data retrieval tool. *Nucleic Acids Res.* **32**, D493-D496, doi:papers3://publication/doi/10.1093/nar/gkh103 (2004).
- 3 Rice, P., Longden, I. & Bleasby, A. EMBOSS: the European Molecular Biology Open Software Suite. *Trends Genet.* **16**, 276-277, doi:papers3://publication/doi/10.1016/S0168-9525(00)02024-2 (2000).
- 4 Li, L., Stoeckert, C. J. & Roos, D. S. OrthoMCL: Identification of ortholog groups for eukaryotic genomes. *Genome Res.* **13**, 2178-2189, doi:papers2://publication/doi/10.1101/gr.1224503 (2003).

- 5 Li, H. *et al.* The Sequence Alignment/Map format and SAMtools. *Bioinformatics* **25**, 2078-2079, doi:papers2://publication/doi/10.1093/bioinformatics/btp352 (2009).
- 6 Li, H. & Durbin, R. Inference of human population history from individual whole-genome sequences. *Nature* **475**, 493-496, doi:10.1038/nature10231 (2011).
- 7 Roach, J. C. *et al.* Analysis of genetic inheritance in a family quartet by whole-genome sequencing. *Science* **328**, 636-639, doi:papers3://publication/doi/10.1126/science.1186802 (2010).
- 8 Kent, W. J. *et al.* The human genome browser at UCSC. *Genome Res.* **12**, 996-1006, doi:papers3://publication/doi/10.1101/gr.229102 (2002).
- 9 Friedländer, M. R. *et al.* Evidence for the biogenesis of more than 1,000 novel human microRNAs. *Genome Biol.* **15**, R57-R57, doi:papers3://publication/doi/10.1186/gb-2014-15-4-r57 (2014).
- 10 Lestrade, L. & Weber, M. J. snoRNA-LBME-db, a comprehensive database of human H/ACA and C/D box snoRNAs. *Nucleic Acids Res* **34**, D158-162, doi:10.1093/nar/gkj002 (2006).
- 11 Cavaille, J. *et al.* Identification of brain-specific and imprinted small nucleolar RNA genes exhibiting an unusual genomic organization. *Proc Natl Acad Sci U S A* **97**, 14311-14316 (2000).
- 12 Skryabin, B. V. *et al.* Deletion of the MBII-85 snoRNA gene cluster in mice results in postnatal growth retardation. *PLoS Genetics* **3**, e235-e235, doi:papers3://publication/doi/10.1371/journal.pgen.0030235 (2007).
- 13 Ender, C. *et al.* A human snoRNA with microRNA-like functions. *Molecular cell* **32**, 519-528 (2008).
- 14 Kehr, S., Bartschat, S., Tafer, H., Stadler, P. F. & Hertel, J. Matching of soulmates: Coevolution of snoRNAs and their targets. *Mol. Biol. Evol.* **31**, 455-467, doi:papers3://publication/doi/10.1093/molbev/mst209 (2014).
